# Supplementary material
Source: PubMed Central journal article supplement (PMC6697528)
Supplement: mmc1.pdf [file mmc1.pdf]

**Biophysical Journal, Volume 117**

**Supplemental Information**

**Structural Insights into Hearing Loss Genetics from Polarizable Protein**

**Repacking**

**Mallory R. Tollefson, Jacob M. Litman, Guowei Qi, Claire E. O'Connell, Matthew J. Wipfler, Robert J. Marini, Hernan V. Bernabe, William T.A. Tollefson, Terry A. Braun, Thomas L. Casavant, Richard J.H. Smith, and Michael J. Schnieders**

## Supplementary Information

**Table S1.** This list includes all genes published in version 8 of the Deafness Variation Database (<http://deafnessvariationdatabase.org/>).

|          |               |                 |          |          |          |       |
|----------|---------------|-----------------|----------|----------|----------|-------|
| ACTG1    | COL2A1        | FAM65B (RIPOR2) | KITLG    | OTOA     | SLC17A8  | TWNK  |
| ADCY1    | COL4A3        | FGF3            | LARS2    | OTOF     | SLC22A4  | USH1C |
| AIFM1    | COL4A4        | FGFR1           | LHFPL5   | OTOG     | SLC26A4  | USH1G |
| ALMS1    | COL4A5        | FGFR2           | LOXHD1   | OTOGL    | SLC26A5  | USH2A |
| ATP2B2   | COL4A6        | FOXI1           | LOXL3    | P2RX2    | SLITRK6  | WFS1  |
| ATP6V1B1 | COL9A1        | GATA3           | LRTOMT   | PAX3     | SMPX     | WHRN  |
| BDP1     | COL9A2        | GIPC3           | MARVELD2 | PCDH15   | SNAI2    |       |
| BSND     | CRYM          | GJB2            | MCM2     | PDZD7    | SOX10    |       |
| CABP2    | DCDC2         | GJB3            | MET      | PEX1     | STRC     |       |
| CACNA1D  | DFNA5 (GSDME) | GJB6            | MIR-96   | PEX6     | SYNE4    |       |
| CCCP110  | DFNB31        | GPR98 (ADGRV1)  | MITF     | PJKV     | TBC1D24  |       |
| CCDC50   | DFNB59        | GPSM2           | MSRB3    | PNPT1    | TBX1     |       |
| CD164    | DIABLO        | GRHL2           | MT-TL1   | POLR1C   | TCOF1    |       |
| CDC14A   | DIAPH1        | GRXCR1          | MT-TS1   | POLR1D   | TECTA    |       |
| CDH23    | DIAPH3        | GRXCR2          | MT-RNR1  | POU3F4   | TECTB    |       |
| CEACAM16 | DSPP          | HARS2           | MYH14    | POU4F3   | TIMM8A   |       |
| CIB2     | EDN3          | HGF             | MYH9     | PRPS1    | TJP2     |       |
| CISD2    | EDNRB         | HOMER2          | MYO15A   | PTPRQ    | TMC1     |       |
| CLDN14   | ELMOD3        | HSD17B4         | MYO3A    | RDX      | TMEM132E |       |
| CLIC5    | EPS8          | ILDR1           | MYO6     | ROR1     | TMIE     |       |
| CLPP     | EPS8L2        | KARS            | MYO7A    | S1PR2    | TMPRSS3  |       |
| CLRN1    | ESPN          | KCNE1           | NARS2    | SCN7A    | TNC      |       |
| COCH     | ESRRB         | KCNJ10          | NLRP3    | SERPINB6 | TPRN     |       |
| COL11A1  | EYA1          | KCNQ1           | OPA1     | SIX1     | TRIOBP   |       |
| COL11A2  | EYA4          | KCNQ4           | OSBPL2   | SIX5     | TSPEAR   |       |

**Table S2. Related to Table 1.** Decomposition of the many-body energy expansion (up to 3-body terms) for COCH domain residues 27-125 as function of generalized Kirkwood (GK) implicit solvent use and residue cutoff. Without GK, the energy expansion decays slowly, and the neglected energy terms sum to hundreds of kcal/mol (i.e. the neglected energy is the known Total AMOEBA/GK potential energy less explicitly calculated terms in the expansion). With GK, the energy expansion decays quickly, and neglected energy is on the order of only a few kcal/mol. The sum of 3-body energy terms when using GK is always less than 1 kcal/mol, but reaches 3.9 kcal/mol without GK.

| GK Solvent | Cutoff (Å) | Backbone (kcal/mol) | Self-Energy Sum (kcal/mol) | 2-Body Energy Sum (kcal/mol) | 3-Body Energy Sum (kcal/mol) | Neglected Sum (kcal/mol) | Total Potential (kcal/mol) |
|------------|------------|---------------------|----------------------------|------------------------------|------------------------------|--------------------------|----------------------------|
| No         | 2          | -953.34             | -1215.03                   | 18.17                        | -0.19                        | 302.76                   | -1847.63                   |
| No         | 3          |                     |                            | -3.59                        | 3.89                         | 320.44                   |                            |
| No         | 6          |                     |                            | 163.77                       | 1.77                         | 155.19                   |                            |
| No         | 9          |                     |                            | 374.22                       | 0.06                         | -53.54                   |                            |
| Yes        | 2          | -2039.14            | -1508.40                   | -99.69                       | -0.06                        | -11.88                   | -3659.19                   |
| Yes        | 3          |                     |                            | -110.10                      | -0.13                        | -1.41                    |                            |
| Yes        | 6          |                     |                            | -112.61                      | -0.30                        | 1.27                     |                            |
| Yes        | 9          |                     |                            | -110.88                      | -0.57                        | -0.19                    |                            |

**Table S3. Related to Table 1.** Energy timings for a three-body expansion of the COCH domain residues 27-125.

| Term        | Number of Energies | % of Total Energies | Seconds   |
|-------------|--------------------|---------------------|-----------|
| Self        | 947                | 0.01                | 262       |
| Two-body    | 120,855            | 1.91                | 32,940    |
| Three-body* | 6,214,642          | 98.08               | 1,624,625 |
| Total       | 6,336,444          | 100.00              | 1,657,827 |

\*indicates extrapolation from finishing 3% of 3-body energies

**Table S4. Related to Table 1.** Residue cutoffs of 2, 3 and 6 Å are examined for three different structures. A comparison of 2 and 3 Å residue cutoffs (applied to residue pair distances from Eq. 7) shows no total potential energy differences greater than 2.5 kcal/mol and MolProbity scores do not vary by more than 0.04 Å.

| Residue Cutoff (Å) | Gene and Residue Range | Total Potential | MolProbity |
|--------------------|------------------------|-----------------|------------|
| 2                  | ACTG1 2-375            | -16919.89       | 0.71       |
| 3                  | ACTG1 2-375            | -16922.21       | 0.71       |
| 6                  | ACTG1 2-375            | -16920.71       | 0.93       |
| 2                  | COCH 27-125            | -3549.42        | 1.78       |
| 3                  | COCH 27-125            | -3549.99        | 1.78       |
| 6                  | COCH 27-125            | -3550.16        | 1.74       |
| 2                  | LRTOMT 118-287         | -7112.79        | 1.40       |
| 3                  | LRTOMT 118-287         | -7112.96        | 1.40       |
| 6                  | LRTOMT 118-287         | -7117.19        | 1.42       |

**Table S5. Related to Table 2.** Energy evaluation timings for global side-chain optimization of residues 27-125 for the COCH domain using a varying number of GPUs (each node contains two Intel Xeon E5-2680v4 CPUs and one or more NVIDIA GTX 1080 TI GPUs) and the AMBER99sb/GB force field.

| Computing Unit<br>(# GPUs) | Time For Energies (sec) | Speed-Up (Relative to Using all CPU Cores and<br>no GPU) |
|----------------------------|-------------------------|----------------------------------------------------------|
| 0 (CPUs only)              | 1034.0                  | 1.0x                                                     |
| 1                          | 216.5                   | 4.8x                                                     |
| 2                          | 124.5                   | 8.3x                                                     |
| 4                          | 69.4                    | 14.9x                                                    |
| 8                          | 43.5                    | 23.8x                                                    |
| 16                         | 28.0                    | 36.9x                                                    |

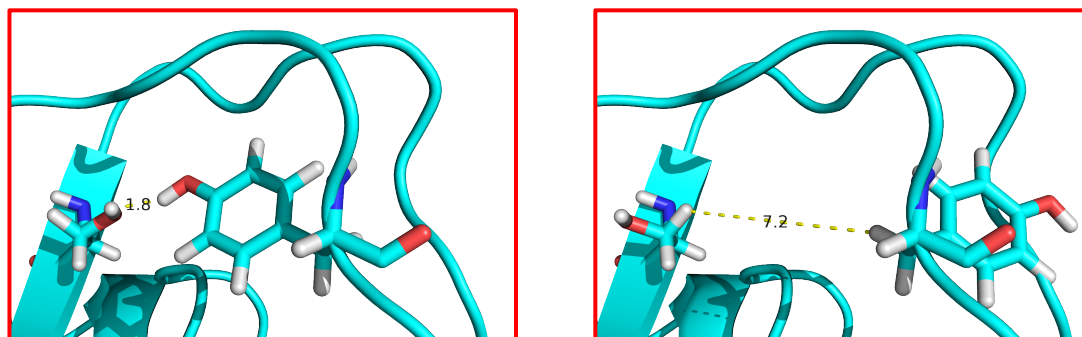

**Figure S1. Related to Table 1B.** Side-chain repacking distance cutoffs. The distances between two (or more) side-chains can vary widely as a function of the currently applied rotamers. The interaction above shows one rotamer pair with a 7.2 Å separation distance, while those same two side-chains have a separation distance of only 1.8 Å for a 2<sup>nd</sup> rotamer pair. The minimum distance between the two residues (i.e. from applying Equation 7) in this case is 1.8 Å, which is within a 2 Å cutoff.

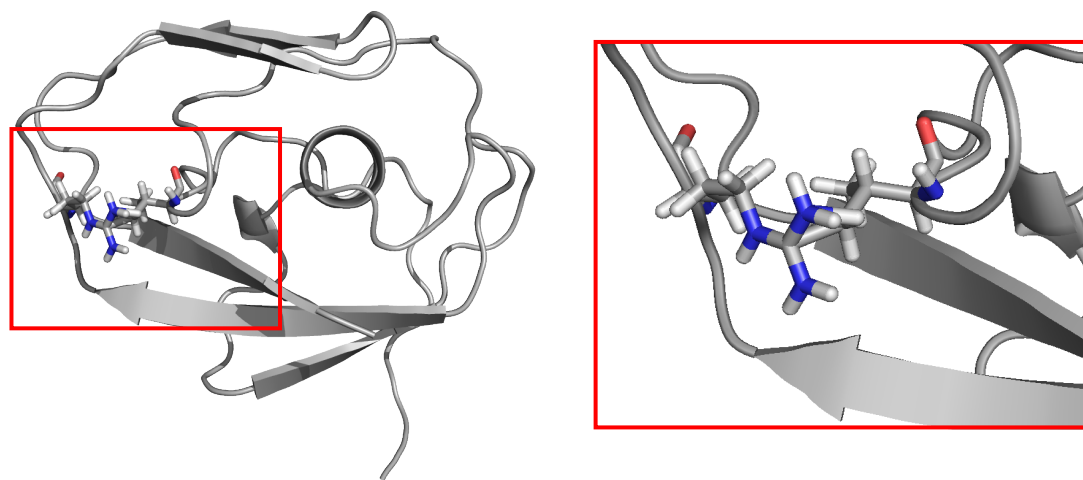

**Figure S2. Related to Table 1B.** Side-chain repacking clashes. Two interacting residues often have a clash for some rotamer permutations for one or more pairs of atoms. These clashes lead to residue separation distance of  $\sim 0$  Å when applying Equation 7, which results in 2-body energies being calculated for all rotamer permutations.

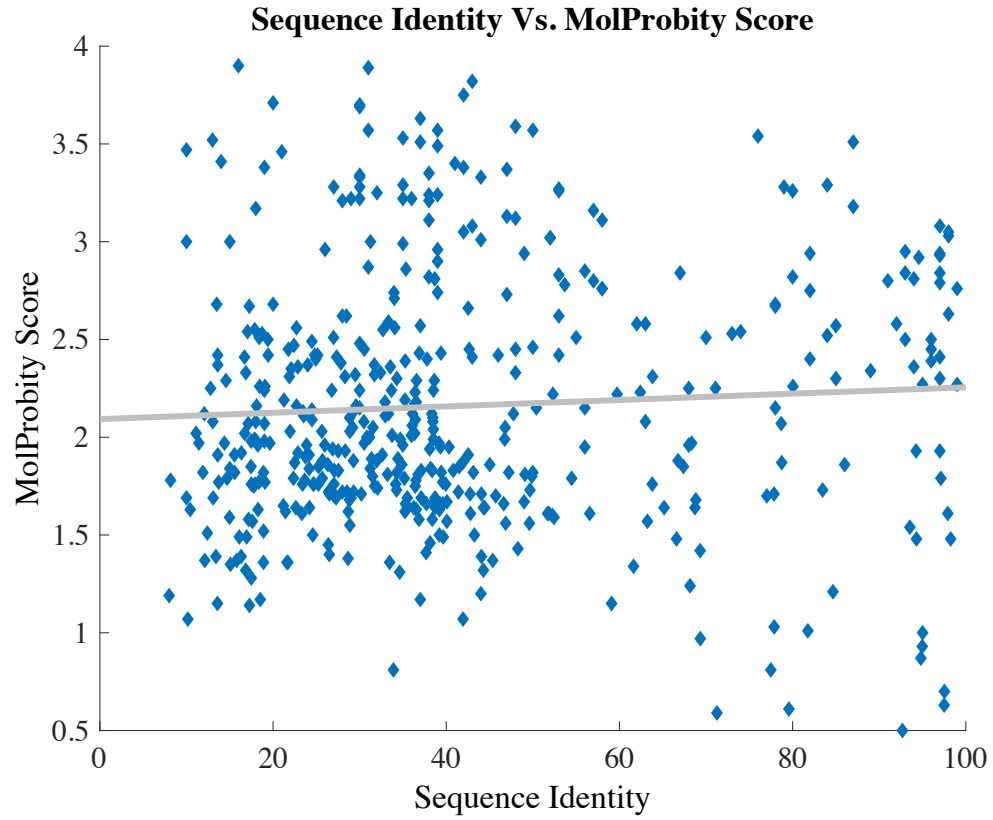

**Figure S3. Related to Figure 3.** Scatter plot of sequence identity vs MolProbity score for the 473 wildtype protein structures results in a linear regression  $R^2$  of only 0.0035.

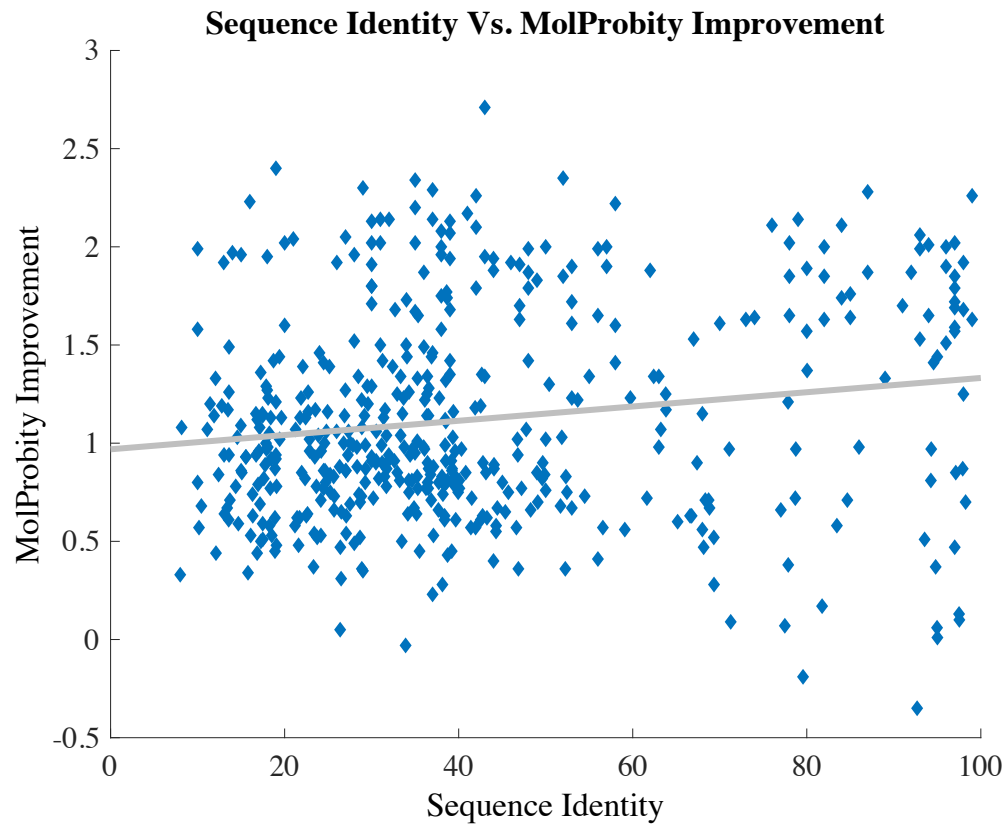

**Figure S4. Related to Figure 3.** Scatter plot of sequence identity vs. MolProbity improvement (*i.e.* the difference between original homology model MolProbity score compared to after AMOEBA/GK repacking) for the 473 wildtype protein structures results in a linear regression  $R^2$  of only 0.0256.

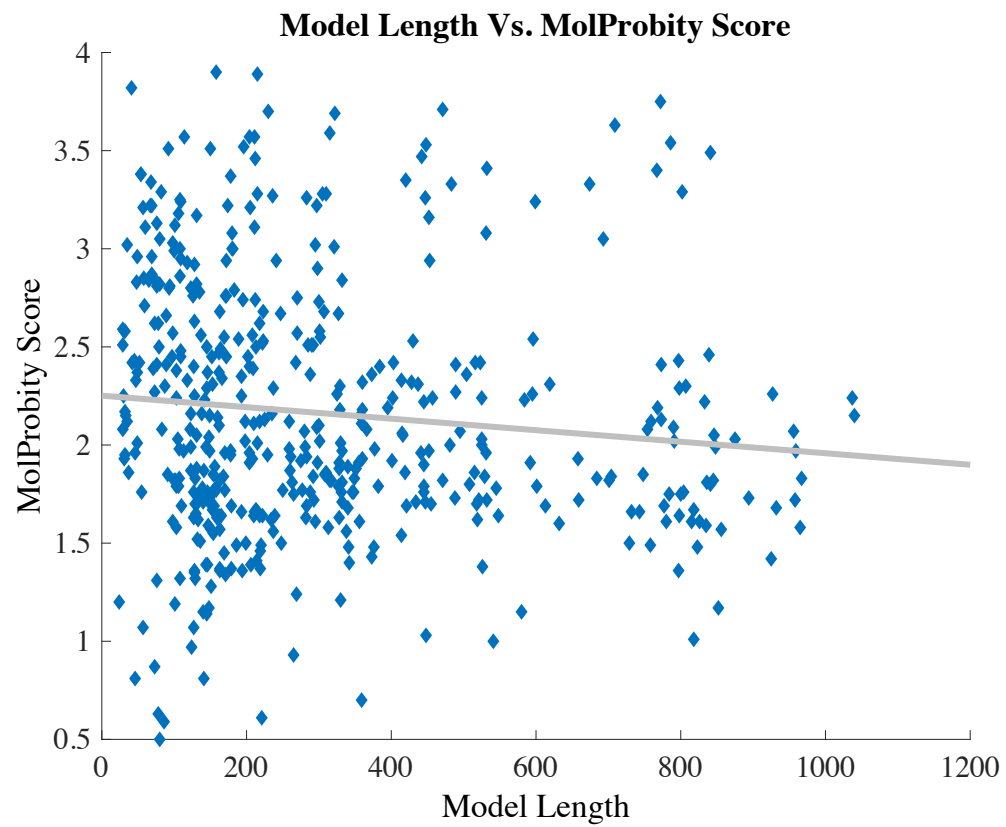

**Figure S5. Related to Figure 3.** Scatter plot of model length vs. MolProbity score for the 473 wildtype protein structures results in a linear regression  $R^2$  of only 0.0119.



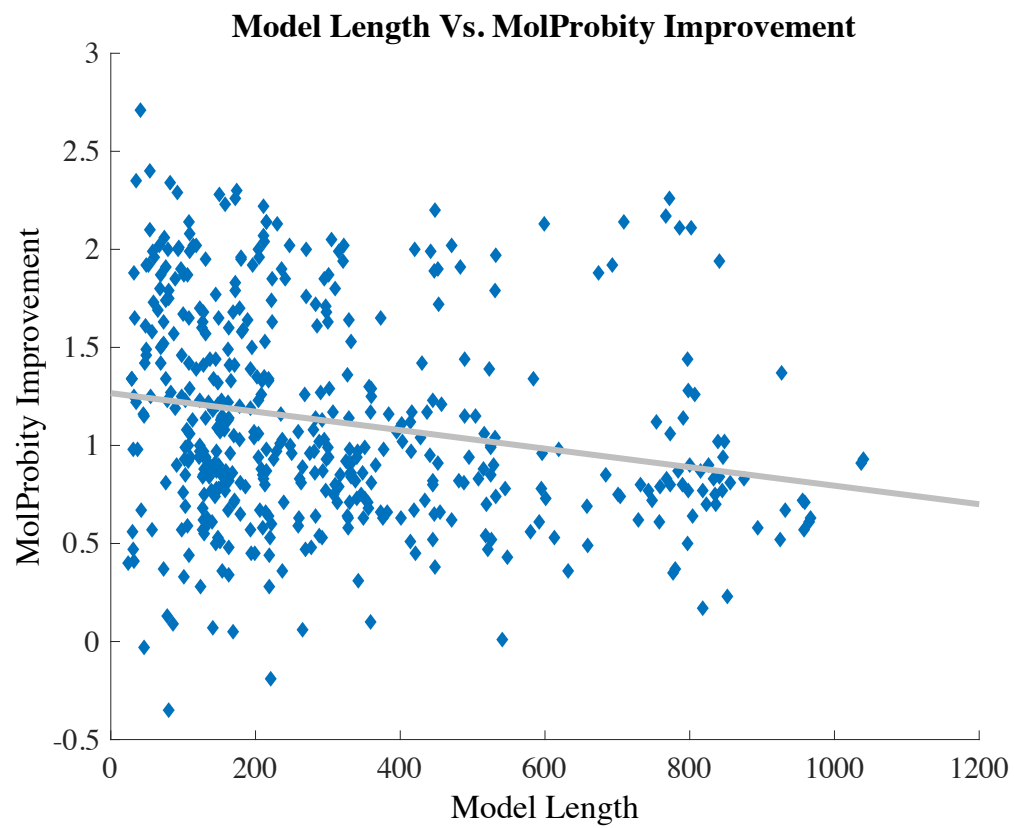

**Figure S6. Related to Figure 3.** Scatter plot of model length vs. MolProbity improvement for the 473 wildtype protein structures results in a linear regression  $R^2$  of only 0.0449.

**Table S6.** Refinement statistics for all of the homology models analyzed in this work. The gene and residue ranges being modeled are shown in the two left-most columns, followed by the sequence identity to the template experimental structure the model was based off of, and then output from the MolProbity scoring algorithm. Table S6 is available in CSV format upon request.

| Gene     | Residue Range | Sequence Identity | Model    | % Poor Rotamers | Clash Score | Ramachandran Outliers | Ramachandran Favored | MolProbity Score | Amoeba Energy (Kcal/Mol) |
|----------|---------------|-------------------|----------|-----------------|-------------|-----------------------|----------------------|------------------|--------------------------|
| ACTG1    | 2-375         | 94.0              | Original | 2.21            | 41.67       | 0.27                  | 99.46                | 2.36             | -16095.87                |
|          |               |                   | FFX      | 1.89            | 0.00        | 0.00                  | 98.92                | 0.71             | -16919.89                |
| ADCY1    | 288-477       | 74.0              | Original | 2.44            | 55.59       | 0.53                  | 97.87                | 2.54             | -8160.62                 |
|          | 855-1057      | 42.7              | Original | 4.00            | 8.13        | 4.48                  | 90.05                | 2.45             | -8507.87                 |
| AIFM1    | 122-611       | 95.0              | Original | 1.74            | 40.78       | 0.20                  | 98.36                | 2.27             | -20925.26                |
|          |               |                   | FFX      | 0.74            | 0.00        | 0.20                  | 95.29                | 0.83             | -22227.11                |
| ALMS1    | 3992-4150     | 16.0              | Original | 6.21            | 201.82      | 2.55                  | 90.45                | 3.90             | -7731.67                 |
|          |               |                   | FFX      | 5.52            | 0.00        | 2.55                  | 87.90                | 1.67             | -8383.55                 |
| ATP2B2   | 364-948       | 36.4              | Original | 2.17            | 7.71        | 1.54                  | 89.88                | 2.23             | -23907.04                |
|          |               |                   | FFX      | 0.39            | 0.00        | 0.69                  | 94.17                | 0.89             | -25502.09                |
|          | 49-1086       | 30.0              | Original | 3.42            | 4.59        | 3.47                  | 87.84                | 2.24             | -41790.12                |
|          |               |                   | FFX      | 2.51            | 0.06        | 1.25                  | 91.70                | 1.33             | -45041.74                |
| 49-1089  | 30.0          | Original          | 3.19     | 4.26            | 2.41        | 89.70                 | 2.15                 | -42612.58        |                          |
|          |               | FFX               | 1.82     | 0.00            | 1.54        | 90.95                 | 1.22                 | -45130.05        |                          |
| ATP6V1B1 | 42-497        | 77.0              | Original | 0.52            | 6.18        | 0.66                  | 94.71                | 1.70             | -19376.71                |
|          |               |                   | FFX      | 1.29            | 0.28        | 0.44                  | 94.93                | 1.04             | -20325.82                |
| ATP6V1B1 | 49-501        | 57.0              | Original | 3.65            | 87.65       | 1.11                  | 95.34                | 3.16             | -19140.93                |
|          |               |                   | FFX      | 2.60            | 0.00        | 1.55                  | 93.13                | 1.26             | -20274.24                |
| BDP1     | 247-376       | 37.1              | Original | 0.85            | 4.21        | 2.34                  | 86.72                | 1.83             | -6161.71                 |
|          |               |                   | FFX      | 0.85            | 0.00        | 0.00                  | 92.97                | 0.95             | -6439.74                 |
|          | 864-1069      | 28.0              | Original | 5.43            | 124.33      | 1.47                  | 97.55                | 3.21             | -11302.65                |
|          |               |                   | FFX      | 3.80            | 0.00        | 0.00                  | 95.59                | 1.25             | -12098.05                |
| BSND     | 240-313       | 28.0              | Original | 1.61            | 71.11       | 1.39                  | 97.22                | 2.62             | -4105.85                 |
|          |               |                   | FFX      | 1.61            | 0.00        | 0.00                  | 93.06                | 1.10             | -4305.94                 |
| CABP2    | 71-220        | 78.0              | Original | 0.00            | 46.55       | 0.00                  | 98.65                | 2.15             | -7773.50                 |
|          |               |                   | FFX      | 0.78            | 0.00        | 0.00                  | 98.65                | 0.50             | -8105.86                 |
|          | 72-220        | 77.9              | Original | 6.30            | 2.99        | 0.00                  | 97.96                | 1.71             | -7879.95                 |
|          |               |                   | FFX      | 0.00            | 0.00        | 0.00                  | 98.64                | 0.50             | -8130.21                 |
|          | 73-218        | 38.6              | Original | 8.87            | 5.22        | 1.39                  | 95.83                | 2.29             | -7431.79                 |
|          |               |                   | FFX      | 0.81            | 0.00        | 0.00                  | 97.92                | 0.52             | -7805.44                 |

| Gene    | Residue Range | Sequence Identity | Model    | % Poor Rotamers | Clash Score | Ramachandran Outliers | Ramachandran Favored | MolProbity Score | Amoeba Energy (Kcal/Mol) |
|---------|---------------|-------------------|----------|-----------------|-------------|-----------------------|----------------------|------------------|--------------------------|
|         | 73-219        | 44.1              | Original | 1.60            | 1.30        | 1.38                  | 94.48                | 1.39             | -7642.12                 |
|         |               |                   | FFX      | 0.00            | 0.00        | 0.00                  | 97.93                | 0.52             | -7839.68                 |
|         | 76-216        | 44.1              | Original | 1.68            | 2.72        | 2.16                  | 92.09                | 1.71             | -7306.47                 |
|         |               |                   | FFX      | 0.00            | 0.45        | 1.44                  | 97.12                | 0.82             | -7534.06                 |
| CACNA1D | 1548-1622     | 93.0              | Original | 3.08            | 50.75       | 0.00                  | 95.89                | 2.84             | -3392.78                 |
|         |               |                   | FFX      | 0.00            | 0.00        | 0.00                  | 95.89                | 0.78             | -3544.73                 |
|         | 1549-1622     | 94.8              | Original | 3.08            | 0.00        | 0.00                  | 100.00               | 0.87             | -3418.61                 |
|         |               |                   | FFX      | 0.00            | 0.00        | 0.00                  | 100.00               | 0.50             | -3535.79                 |
| CCDC50  | 77-159        | 35.0              | Original | 5.48            | 82.14       | 0.00                  | 95.06                | 3.29             | -4932.08                 |
|         |               |                   | FFX      | 1.37            | 0.00        | 0.00                  | 95.06                | 0.95             | -5165.75                 |
| CD164   | 56-105        | 26.0              | Original | 0.00            | 121.64      | 2.08                  | 93.75                | 2.96             | -2036.11                 |
|         |               |                   | FFX      | 2.13            | 0.00        | 2.08                  | 95.83                | 1.04             | -2159.47                 |
| CDC14A  | 11-343        | 67.0              | Original | 2.08            | 72.05       | 0.91                  | 96.07                | 2.84             | -14382.76                |
|         |               |                   | FFX      | 3.82            | 0.00        | 0.91                  | 94.56                | 1.31             | -15526.89                |
|         | 15-343        | 66.8              | Original | 2.11            | 4.29        | 1.22                  | 93.58                | 1.88             | -14707.84                |
|         |               |                   | FFX      | 2.81            | 0.00        | 0.61                  | 93.88                | 1.25             | -15318.90                |
| CDH23   | 1107-1626     | 28.7              | Original | 0.00            | 4.16        | 0.58                  | 93.63                | 1.62             | -24391.45                |
|         |               |                   | FFX      | 0.45            | 0.00        | 0.39                  | 93.63                | 0.92             | -25458.39                |
|         | 1321-1846     | 31.1              | Original | 0.44            | 7.97        | 2.48                  | 89.50                | 2.00             | -24475.87                |
|         |               |                   | FFX      | 0.66            | 0.00        | 1.15                  | 91.41                | 1.01             | -25750.00                |
|         | 1424-1953     | 31.2              | Original | 0.65            | 6.28        | 0.95                  | 91.86                | 1.84             | -25304.09                |
|         |               |                   | FFX      | 0.43            | 0.00        | 1.52                  | 93.18                | 0.94             | -26868.44                |
|         | 2211-2699     | 34.3              | Original | 0.24            | 5.37        | 0.82                  | 93.22                | 1.73             | -22811.90                |
|         |               |                   | FFX      | 0.24            | 0.00        | 0.82                  | 93.63                | 0.92             | -23959.17                |
|         | 240-772       | 28.5              | Original | 0.43            | 4.51        | 2.45                  | 91.71                | 1.72             | -23024.64                |
|         |               |                   | FFX      | 1.07            | 0.00        | 1.13                  | 92.66                | 0.98             | -24278.44                |
|         | 2503-2603     | 35.0              | Original | 1.14            | 91.82       | 2.02                  | 90.91                | 2.99             | -4297.13                 |
|         |               |                   | FFX      | 2.27            | 0.00        | 1.01                  | 89.90                | 1.32             | -4518.60                 |
|         | 2506-3051     | 23.7              | Original | 0.42            | 5.75        | 1.65                  | 92.65                | 1.78             | -23327.99                |
|         |               |                   | FFX      | 1.26            | 0.00        | 1.29                  | 93.57                | 1.00             | -24699.75                |
|         | 375-879       | 33.5              | Original | 2.68            | 7.97        | 2.78                  | 87.87                | 2.36             | -22035.26                |
|         |               |                   | FFX      | 1.79            | 0.00        | 1.19                  | 91.05                | 1.21             | -23748.16                |
|         | 782-1308      | 28.7              | Original | 1.52            | 1.12        | 1.14                  | 93.52                | 1.38             | -22585.79                |
|         |               |                   | FFX      | 1.08            | 0.00        | 0.38                  | 95.24                | 0.86             | -23810.21                |
|         | 887-1408      | 26.4              | Original | 3.79            | 0.50        | 2.88                  | 87.88                | 1.72             | -21387.14                |
|         |               |                   | FFX      | 2.23            | 0.00        | 1.92                  | 92.12                | 1.25             | -22569.53                |
|         | 894-1417      | 25.2              | Original | 3.33            | 7.86        | 3.45                  | 88.12                | 2.42             | -21311.52                |

| Gene           | Residue Range | Sequence Identity | Model    | % Poor Rotamers | Clash Score | Ramachandran Outliers | Ramachandran Favored | MolProbity Score | Amoeba Energy (Kcal/Mol) |
|----------------|---------------|-------------------|----------|-----------------|-------------|-----------------------|----------------------|------------------|--------------------------|
|                |               |                   | FFX      | 0.67            | 0.00        | 0.96                  | 90.61                | 1.03             | -22767.11                |
|                | 905-1413      | 31.5              | Original | 0.69            | 5.52        | 2.17                  | 91.52                | 1.80             | -22301.54                |
|                |               |                   | FFX      | 0.92            | 0.00        | 0.59                  | 92.50                | 0.97             | -23487.82                |
|                | 997-1528      | 23.9              | Original | 1.10            | 7.75        | 3.77                  | 91.32                | 1.96             | -22806.57                |
|                |               |                   | FFX      | 0.66            | 0.00        | 0.94                  | 93.58                | 0.92             | -23896.39                |
| CEACAM16       | 20-118        | 37.0              | Original | 1.22            | 55.06       | 0.00                  | 95.88                | 2.57             | -3994.18                 |
|                |               |                   | FFX      | 3.66            | 0.00        | 0.00                  | 96.91                | 1.11             | -4163.72                 |
|                | 20-421        | 16.3              | Original | 1.47            | 4.58        | 3.50                  | 89.50                | 1.92             | -14857.10                |
|                |               |                   | FFX      | 2.36            | 0.00        | 2.50                  | 91.50                | 1.29             | -15858.62                |
| CEACAM16-Dimer | 19-422        | 19.4              | Original | 1.77            | 12.57       | 4.10                  | 87.19                | 2.42             | -29164.80                |
|                |               |                   | FFX      | 2.95            | 0.08        | 1.87                  | 91.42                | 1.40             | -31738.99                |
|                | 27-422        | 21.3              | Original | 1.20            | 10.73       | 3.30                  | 88.83                | 2.19             | -28921.58                |
|                |               |                   | FFX      | 1.35            | 0.17        | 1.40                  | 92.77                | 1.12             | -31200.05                |
| CIB2           | 139-174       | 52.0              | Original | 3.33            | 98.11       | 0.00                  | 97.06                | 3.02             | -2189.09                 |
|                |               |                   | FFX      | 0.00            | 0.00        | 0.00                  | 97.06                | 0.67             | -2239.22                 |
|                | 8-187         | 38.7              | Original | 1.22            | 3.12        | 3.93                  | 91.01                | 1.69             | -8802.87                 |
|                |               |                   | FFX      | 1.22            | 0.00        | 1.69                  | 95.51                | 0.88             | -9158.32                 |
|                | 9-187         | 39.3              | Original | 3.07            | 3.84        | 1.69                  | 93.79                | 1.95             | -8757.11                 |
|                |               |                   | FFX      | 1.84            | 0.00        | 1.13                  | 96.61                | 0.92             | -9142.42                 |
| CISD2          | 68-133        | 97.0              | Original | 3.33            | 29.92       | 1.56                  | 92.19                | 2.84             | -3208.38                 |
|                |               |                   | FFX      | 1.67            | 0.00        | 0.00                  | 92.19                | 1.15             | -3311.94                 |
| CLDN14         | 4-183         | 45.4              | Original | 1.36            | 4.34        | 1.12                  | 97.75                | 1.37             | -5385.07                 |
|                |               |                   | FFX      | 0.68            | 0.00        | 0.56                  | 96.63                | 0.72             | -5711.90                 |
|                | 4-184         | 43.0              | Original | 2.70            | 85.67       | 3.35                  | 94.97                | 3.08             | -5109.82                 |
|                |               |                   | FFX      | 0.00            | 0.36        | 3.35                  | 91.62                | 1.13             | -5632.88                 |
| CLIC5          | 162-409       | 78.0              | Original | 1.42            | 63.67       | 0.81                  | 95.93                | 2.67             | -11551.14                |
|                |               |                   | FFX      | 0.94            | 0.00        | 0.41                  | 97.15                | 0.65             | -12269.96                |
| CLPP           | 74-245        | 58.0              | Original | 2.76            | 76.35       | 0.00                  | 97.65                | 2.76             | -6754.55                 |
|                |               |                   | FFX      | 4.83            | 0.00        | 0.00                  | 95.29                | 1.35             | -7103.42                 |
| CLRN1          | 99-213        | 31.0              | Original | 4.00            | 120.43      | 0.88                  | 89.38                | 3.57             | -3651.63                 |
|                |               |                   | FFX      | 4.00            | 0.00        | 0.00                  | 88.50                | 1.55             | -4016.48                 |
| COCH           | 162-387       | 23.5              | Original | 0.52            | 10.24       | 4.46                  | 87.95                | 2.13             | -9177.87                 |
|                |               |                   | FFX      | 2.09            | 0.00        | 1.79                  | 92.86                | 1.20             | -9645.22                 |
|                | 162-544       | 25.7              | Original | 1.87            | 2.37        | 2.36                  | 89.50                | 1.79             | -15705.36                |
|                |               |                   | FFX      | 1.56            | 0.00        | 1.57                  | 92.13                | 1.13             | -16649.60                |
|                | 266-503       | 14.6              | Original | 2.46            | 11.51       | 2.12                  | 93.64                | 2.29             | -9283.22                 |

| Gene           | Residue Range | Sequence Identity | Model    | % Poor Rotamers | Clash Score | Ramachandran Outliers | Ramachandran Favored | MolProbity Score | Amoeba Energy (Kcal/Mol) |
|----------------|---------------|-------------------|----------|-----------------|-------------|-----------------------|----------------------|------------------|--------------------------|
|                |               |                   | FFX      | 2.96            | 0.00        | 2.54                  | 94.07                | 1.26             | -9764.98                 |
|                | 27-125        | 98.0              | Original | 2.50            | 70.10       | 1.03                  | 93.81                | 3.03             | -3659.32                 |
|                |               |                   | FFX      | 5.00            | 0.69        | 0.00                  | 90.72                | 1.78             | -3868.52                 |
| COL11A1        | 1500-1532     | 62.0              | Original | 4.76            | 38.65       | 0.00                  | 100.00               | 2.58             | -1222.53                 |
|                |               |                   | FFX      | 0.00            | 0.00        | 0.00                  | 96.77                | 0.70             | -1271.96                 |
|                | 67-229        | 28.9              | Original | 0.00            | 10.88       | 2.48                  | 90.06                | 2.10             | -7224.92                 |
|                |               |                   | FFX      | 0.00            | 0.00        | 0.62                  | 94.41                | 0.88             | -7500.58                 |
| COL11A1-Trimer | 1595-1805     | 44.3              | Original | 0.18            | 3.18        | 2.72                  | 90.72                | 1.64             | -29011.08                |
|                |               |                   | FFX      | 1.07            | 0.00        | 1.28                  | 90.56                | 1.06             | -30608.28                |
| COL11A2        | 46-192        | 31.7              | Original | 3.31            | 6.87        | 5.52                  | 88.28                | 2.37             | -5528.01                 |
|                |               |                   | FFX      | 4.13            | 0.00        | 4.83                  | 86.90                | 1.59             | -5783.03                 |
|                | 919-950       | 63.0              | Original | 0.00            | 46.39       | 0.00                  | 93.33                | 2.58             | -1201.33                 |
|                |               |                   | FFX      | 5.26            | 0.00        | 0.00                  | 90.00                | 1.60             | -1284.63                 |
| COL11A2-Trimer | 1542-1735     | 46.6              | Original | 1.00            | 3.65        | 2.26                  | 91.49                | 1.66             | -26654.76                |
|                |               |                   | FFX      | 1.20            | 0.00        | 1.56                  | 90.80                | 1.09             | -28017.99                |
| COL2A1         | 969-1000      | 97.0              | Original | 0.00            | 27.59       | 0.00                  | 100.00               | 1.93             | -1166.62                 |
|                |               |                   | FFX      | 5.00            | 0.00        | 0.00                  | 93.33                | 1.46             | -1247.06                 |
| COL2A1-Trimer  | 1248-1487     | 68.7              | Original | 1.78            | 2.80        | 0.99                  | 94.51                | 1.64             | -33839.58                |
|                |               |                   | FFX      | 1.13            | 0.00        | 0.70                  | 94.23                | 0.93             | -35383.79                |
| COL4A3         | 637-674       | 86.0              | Original | 0.00            | 23.31       | 0.00                  | 100.00               | 1.86             | -1333.20                 |
|                |               |                   | FFX      | 0.00            | 0.00        | 0.00                  | 94.44                | 0.88             | -1375.13                 |
| COL4A4         | 1465-1688     | 73.0              | Original | 0.53            | 50.91       | 0.90                  | 95.05                | 2.53             | -8666.36                 |
|                |               |                   | FFX      | 0.53            | 0.00        | 0.90                  | 94.14                | 0.90             | -9175.96                 |
| COL4A5         | 1461-1683     | 84.0              | Original | 2.63            | 38.68       | 0.45                  | 97.29                | 2.52             | -8494.09                 |
|                |               |                   | FFX      | 0.53            | 0.00        | 0.00                  | 95.93                | 0.78             | -9001.87                 |
| COL4A6         | 1466-1689     | 78.0              | Original | 2.07            | 41.50       | 0.45                  | 95.05                | 2.68             | -8416.80                 |
|                |               |                   | FFX      | 1.04            | 0.00        | 0.45                  | 95.50                | 0.83             | -8987.94                 |
| COL4A6-Hexamer | 1467-1689     | 65.2              | Original | 1.04            | 4.50        | 0.90                  | 94.12                | 1.64             | -52381.81                |
|                |               |                   | FFX      | 1.56            | 0.05        | 1.28                  | 94.49                | 1.04             | -54965.54                |
| COL9A1         | 363-392       | 63.0              | Original | 5.26            | 10.26       | 0.00                  | 100.00               | 2.08             | -1085.20                 |
|                |               |                   | FFX      | 0.00            | 0.00        | 0.00                  | 96.43                | 0.74             | -1140.12                 |
| COL9A2         | 33-79         | 68.0              | Original | 0.00            | 26.55       | 0.00                  | 97.78                | 1.96             | -2055.17                 |
|                |               |                   | FFX      | 0.00            | 0.00        | 0.00                  | 95.56                | 0.81             | -2123.72                 |
| CRYM           | 4-314         | 30.0              | Original | 2.36            | 0.00        | 1.29                  | 93.20                | 3.28             | -12367.56                |
|                |               |                   | FFX      | 4.33            | 0.00        | 0.65                  | 91.59                | 1.48             | -13220.35                |

| Gene         | Residue Range | Sequence Identity | Model    | % Poor Rotamers | Clash Score | Ramachandran Outliers | Ramachandran Favored | MolProbity Score | Amoeba Energy (Kcal/Mol) |
|--------------|---------------|-------------------|----------|-----------------|-------------|-----------------------|----------------------|------------------|--------------------------|
| DCDC2        | 129-226       | 96.0              | Original | 1.16            | 54.04       | 0.00                  | 96.88                | 2.45             | -4310.76                 |
|              |               |                   | FFX      | 1.16            | 0.00        | 0.00                  | 100.00               | 0.55             | -4545.30                 |
|              | 15-123        | 31.3              | Original | 5.38            | 18.22       | 3.74                  | 83.18                | 3.00             | -4650.71                 |
|              |               |                   | FFX      | 4.30            | 0.00        | 3.74                  | 87.85                | 1.58             | -4906.98                 |
| DIABLO       | 67-239        | 99.0              | Original | 3.38            | 44.82       | 0.58                  | 96.49                | 2.76             | -8041.05                 |
|              |               |                   | FFX      | 0.68            | 0.00        | 0.00                  | 98.25                | 0.50             | -8591.04                 |
| DIAPH1       | 762-1215      | 97.0              | Original | 4.13            | 44.35       | 1.33                  | 94.91                | 2.94             | -22098.48                |
|              |               |                   | FFX      | 3.64            | 0.00        | 0.22                  | 95.80                | 1.22             | -23358.68                |
|              | 92-452        | 94.3              | Original | 10.67           | 0.68        | 0.56                  | 93.59                | 1.93             | -16982.34                |
|              |               |                   | FFX      | 2.44            | 0.00        | 0.28                  | 95.26                | 1.12             | -17823.43                |
| DIAPH1-Dimer | 142-483       | 94.3              | Original | 5.86            | 0.82        | 0.15                  | 97.21                | 1.48             | -33400.71                |
|              |               |                   | FFX      | 0.81            | 0.00        | 0.00                  | 97.94                | 0.51             | -34668.15                |
| DIAPH3       | 122-479       | 50.4              | Original | 4.55            | 4.10        | 1.69                  | 92.70                | 2.15             | -16786.33                |
|              |               |                   | FFX      | 1.52            | 0.00        | 0.28                  | 96.63                | 0.85             | -17635.74                |
|              | 633-1078      | 59.7              | Original | 4.06            | 4.69        | 2.25                  | 91.22                | 2.22             | -21919.74                |
|              |               |                   | FFX      | 1.43            | 0.00        | 0.90                  | 94.59                | 0.99             | -23168.42                |
|              | 916-1096      | 15.0              | Original | 2.99            | 91.18       | 0.56                  | 96.65                | 3.00             | -9348.95                 |
|              |               |                   | FFX      | 1.80            | 0.00        | 0.56                  | 94.97                | 1.04             | -9999.64                 |
| DIAPH3-Dimer | 173-511       | 49.6              | Original | 2.88            | 1.18        | 0.74                  | 94.51                | 1.56             | -32558.65                |
|              |               |                   | FFX      | 0.80            | 0.00        | 0.30                  | 96.44                | 0.74             | -33949.54                |
|              | 637-1053      | 31.5              | Original | 2.27            | 6.40        | 1.69                  | 93.37                | 2.05             | -41250.90                |
|              |               |                   | FFX      | 0.50            | 0.14        | 0.48                  | 95.30                | 0.88             | -43599.46                |
| DSPP         | 88-318        | 30.0              | Original | 3.26            | 140.58      | 6.11                  | 82.53                | 3.70             | -12328.88                |
|              |               |                   | FFX      | 2.72            | 0.00        | 3.06                  | 79.48                | 1.57             | -13123.69                |
| EDN3         | 42-91         | 24.0              | Original | 0.00            | 24.19       | 2.08                  | 91.67                | 2.37             | -2258.58                 |
|              |               |                   | FFX      | 0.00            | 0.00        | 0.00                  | 93.75                | 0.91             | -2367.87                 |
|              | 97-121        | 44.0              | Original | 0.00            | 0.00        | 4.35                  | 82.61                | 1.20             | -1098.66                 |
|              |               |                   | FFX      | 0.00            | 0.00        | 0.00                  | 95.65                | 0.80             | -1156.49                 |
| EDNRB        | 105-402       | 30.0              | Original | 1.88            | 130.30      | 3.04                  | 93.24                | 3.22             | -9457.52                 |
|              |               |                   | FFX      | 4.51            | 0.00        | 1.69                  | 91.22                | 1.51             | -10589.24                |
| ELMOD3       | 277-312       | 36.1              | Original | 6.25            | 1.69        | 0.00                  | 88.24                | 2.12             | -1423.19                 |
|              |               |                   | FFX      | 0.00            | 0.00        | 0.00                  | 94.12                | 0.90             | -1483.05                 |
| EPS8         | 699-788       | 97.0              | Original | 0.00            | 51.58       | 1.14                  | 96.59                | 2.41             | -3756.63                 |
|              |               |                   | FFX      | 0.00            | 0.00        | 0.00                  | 97.73                | 0.56             | -3909.23                 |
| EPS8-Dimer   | 59-188        | 44.3              | Original | 0.83            | 3.40        | 0.78                  | 96.88                | 1.32             | -12611.43                |
|              |               |                   | FFX      | 0.00            | 0.00        | 0.00                  | 96.09                | 0.77             | -13017.20                |

| Gene         | Residue Range | Sequence Identity | Model    | % Poor Rotamers | Clash Score | Ramachandran Outliers | Ramachandran Favored | MolProbity Score | Amoeba Energy (Kcal/Mol) |           |
|--------------|---------------|-------------------|----------|-----------------|-------------|-----------------------|----------------------|------------------|--------------------------|-----------|
| EPS8L2       | 611-698       | 97.0              | Original | 1.28            | 47.01       | 0.00                  | 97.67                | 2.30             | -4135.37                 |           |
|              |               |                   | FFX      | 0.00            | 0.00        | 0.00                  | 96.51                | 0.73             | -4343.06                 |           |
| EPS8L2-Dimer | 46-175        | 45.7              | Original | 3.23            | 2.16        | 0.78                  | 95.31                | 1.70             | -12837.81                |           |
|              |               |                   | FFX      | 0.81            | 0.00        | 0.00                  | 92.97                | 0.95             | -13329.34                |           |
|              | 495-550       | 63.8              | Original | 5.21            | 4.36        | 0.00                  | 99.07                | 1.76             | -5608.72                 |           |
|              |               |                   | FFX      | 1.04            | 0.00        | 0.00                  | 99.07                | 0.51             | -5800.21                 |           |
| ESPN         | 1-330         | 85.0              | Original | 2.00            | 38.75       | 0.00                  | 98.17                | 2.30             | -14391.48                |           |
|              |               |                   | FFX      | 1.60            | 0.00        | 0.00                  | 99.09                | 0.66             | -14931.84                |           |
|              | 1-331         | 84.7              | Original | 1.20            | 2.06        | 0.30                  | 96.96                | 1.21             | -14472.53                |           |
|              |               |                   | FFX      | 0.00            | 0.00        | 0.00                  | 98.18                | 0.50             | -14916.48                |           |
|              | 75-325        | 39.6              | Original | 1.03            | 6.54        | 0.00                  | 93.98                | 1.77             | -10938.03                |           |
|              |               |                   | FFX      | 0.00            | 0.00        | 0.00                  | 95.58                | 0.81             | -11336.42                |           |
|              | 90-324        | 35.2              | Original | 0.55            | 5.84        | 2.15                  | 95.71                | 1.62             | -10238.66                |           |
|              |               |                   | FFX      | 0.55            | 0.29        | 0.43                  | 98.28                | 0.61             | -10659.53                |           |
|              | ESRRB         | 100-429           | 36.5     | Original        | 2.08        | 6.33                  | 3.66                 | 88.41            | 2.18                     | -14868.95 |
|              |               |                   |          | FFX             | 1.04        | 0.00                  | 1.22                 | 90.85            | 1.04                     | -15556.17 |
| 100-432      |               | 36.8              | Original | 1.03            | 5.71        | 2.42                  | 91.84                | 1.81             | -14774.04                |           |
|              |               |                   | FFX      | 0.69            | 0.00        | 0.91                  | 92.45                | 0.97             | -15497.02                |           |
| 101-431      |               | 36.0              | Original | 1.38            | 7.62        | 1.52                  | 92.10                | 2.01             | -14899.18                |           |
|              |               |                   | FFX      | 1.04            | 0.19        | 1.22                  | 93.01                | 1.03             | -15734.16                |           |
| 102-429      |               | 35.2              | Original | 1.74            | 3.00        | 2.76                  | 91.10                | 1.79             | -14802.81                |           |
|              |               |                   | FFX      | 1.74            | 0.00        | 1.84                  | 92.64                | 1.15             | -15488.66                |           |
| 102-430      |               | 32.6              | Original | 0.35            | 7.11        | 2.14                  | 91.13                | 1.91             | -14512.62                |           |
|              |               |                   | FFX      | 1.39            | 0.00        | 0.92                  | 94.19                | 1.00             | -15256.71                |           |
| 99-430       |               | 27.0              | Original | 1.72            | 3.33        | 1.21                  | 92.73                | 1.76             | -14609.35                |           |
|              |               |                   | FFX      | 1.03            | 0.00        | 0.61                  | 94.24                | 0.90             | -15357.72                |           |
| 99-431       |               | 27.0              | Original | 0.69            | 5.91        | 0.91                  | 94.26                | 1.71             | -14988.56                |           |
|              |               |                   | FFX      | 1.03            | 0.00        | 1.21                  | 95.17                | 0.85             | -15782.58                |           |
| ESRRB-Dimer  | 209-430       | 79.6              | Original | 1.02            | 0.27        | 0.00                  | 98.64                | 0.61             | -20082.23                |           |
|              |               |                   | FFX      | 0.51            | 0.27        | 0.00                  | 96.82                | 0.80             | -20615.47                |           |
| EYA1         | 322-592       | 85.0              | Original | 0.87            | 58.03       | 0.74                  | 95.17                | 2.57             | -11383.47                |           |
|              |               |                   | FFX      | 0.87            | 0.00        | 0.37                  | 95.54                | 0.81             | -12281.43                |           |
| EYA4         | 369-639       | 82.0              | Original | 2.16            | 51.02       | 0.37                  | 95.54                | 2.75             | -11545.13                |           |
|              |               |                   | FFX      | 0.43            | 0.00        | 0.37                  | 96.28                | 0.75             | -12327.92                |           |
| FGF3         | 38-86         | 53.0              | Original | 0.00            | 87.58       | 0.00                  | 93.62                | 2.83             | -1965.90                 |           |
|              |               |                   | FFX      | 2.50            | 0.00        | 4.26                  | 93.62                | 1.22             | -2085.72                 |           |
| FGF3-Dimer   | 34-196        | 44.4              | Original | 2.56            | 1.14        | 1.57                  | 91.54                | 1.64             | -14359.07                |           |

| Gene             | Residue Range | Sequence Identity | Model    | % Poor Rotamers | Clash Score | Ramachandran Outliers | Ramachandran Favored | MolProbity Score | Amoeba Energy (Kcal/Mol) |
|------------------|---------------|-------------------|----------|-----------------|-------------|-----------------------|----------------------|------------------|--------------------------|
|                  |               |                   | FFX      | 1.10            | 0.00        | 0.31                  | 93.10                | 0.97             | -15034.82                |
| FGFR1            | 288-771       | 30.0              | Original | 2.59            | 120.34      | 2.49                  | 92.32                | 3.33             | -19802.51                |
|                  |               |                   | FFX      | 3.54            | 0.00        | 1.66                  | 91.49                | 1.42             | -21460.86                |
| FGFR2            | 479-801       | 30.0              | Original | 3.85            | 152.48      | 3.12                  | 87.85                | 3.69             | -13668.07                |
|                  |               |                   | FFX      | 3.85            | 0.39        | 1.56                  | 88.79                | 1.67             | -15020.36                |
| FOXI1            | 121-212       | 67.4              | Original | 3.70            | 1.37        | 1.11                  | 90.00                | 1.85             | -4245.86                 |
|                  |               |                   | FFX      | 1.23            | 0.00        | 1.11                  | 94.44                | 0.95             | -4398.66                 |
|                  | 122-220       | 56.6              | Original | 2.27            | 0.62        | 2.06                  | 86.60                | 1.61             | -5186.87                 |
|                  |               |                   | FFX      | 1.14            | 0.00        | 3.09                  | 91.75                | 1.04             | -5375.18                 |
| GIPC3            | 105-198       | 57.0              | Original | 3.75            | 47.75       | 0.00                  | 96.74                | 2.80             | -4473.00                 |
|                  |               |                   | FFX      | 0.00            | 0.00        | 0.00                  | 95.65                | 0.80             | -4679.23                 |
|                  | 70-193        | 18.1              | Original | 1.90            | 7.74        | 2.46                  | 90.98                | 2.16             | -5419.67                 |
|                  |               |                   | FFX      | 0.95            | 0.00        | 0.00                  | 93.44                | 0.93             | -5653.88                 |
| GIPC3-Dimer      | 37-306        | 68.2              | Original | 1.34            | 1.32        | 0.56                  | 95.90                | 1.24             | -24916.75                |
|                  |               |                   | FFX      | 0.67            | 0.00        | 0.37                  | 96.08                | 0.77             | -25856.15                |
| GJB3             | 2-213         | 58.0              | Original | 2.12            | 83.69       | 2.38                  | 92.38                | 3.11             | -7705.75                 |
|                  |               |                   | FFX      | 0.53            | 0.00        | 0.95                  | 94.29                | 0.89             | -8523.55                 |
| GJB6             | 2-217         | 79.0              | Original | 3.06            | 87.49       | 1.40                  | 91.59                | 3.28             | -7833.48                 |
|                  |               |                   | FFX      | 2.04            | 0.00        | 1.87                  | 93.93                | 1.14             | -8699.71                 |
| GPR98(ADGRV1)    | 3254-3579     | 18.5              | Original | 0.35            | 13.47       | 1.23                  | 87.04                | 2.26             | -12294.56                |
|                  |               |                   | FFX      | 2.43            | 0.00        | 0.31                  | 90.12                | 1.34             | -13159.68                |
|                  | 4270-4339     | 39.0              | Original | 1.75            | 69.98       | 2.94                  | 92.65                | 2.96             | -3093.62                 |
|                  |               |                   | FFX      | 3.51            | 0.00        | 1.47                  | 86.76                | 1.54             | -3302.16                 |
|                  | 5593-5900     | 13.5              | Original | 2.58            | 21.10       | 3.27                  | 90.20                | 2.68             | -12773.41                |
|                  |               |                   | FFX      | 4.43            | 0.21        | 1.31                  | 93.14                | 1.51             | -13419.72                |
| GPSM2            | 117-648       | 97.0              | Original | 5.66            | 52.45       | 1.51                  | 95.47                | 3.08             | -23631.57                |
|                  |               |                   | FFX      | 3.49            | 0.00        | 0.57                  | 94.53                | 1.29             | -25193.32                |
|                  | 169-509       | 34.4              | Original | 2.78            | 2.42        | 2.06                  | 90.86                | 1.89             | -15950.79                |
|                  |               |                   | FFX      | 0.69            | 0.00        | 0.59                  | 92.92                | 0.95             | -16716.64                |
| GRHL2            | 248-489       | 82.0              | Original | 5.05            | 47.45       | 0.83                  | 96.25                | 2.94             | -10926.10                |
|                  |               |                   | FFX      | 2.29            | 0.00        | 1.25                  | 95.42                | 1.09             | -11718.01                |
| GRXCR1           | 231-288       | 38.0              | Original | 1.96            | 68.60       | 1.79                  | 83.93                | 3.21             | -2450.97                 |
|                  |               |                   | FFX      | 3.92            | 0.00        | 3.57                  | 83.93                | 1.63             | -2605.75                 |
| GRXCR1-Heteromer | 91-218        | 25.2              | Original | 3.11            | 1.45        | 2.39                  | 91.43                | 1.76             | -22461.96                |
|                  |               |                   | FFX      | 0.44            | 0.00        | 1.20                  | 93.63                | 0.92             | -23762.37                |



| Gene         | Residue Range | Sequence Identity | Model    | % Poor Rotamers | Clash Score | Ramachandran Outliers | Ramachandran Favored | MolProbity Score | Amoeba Energy (Kcal/Mol) |
|--------------|---------------|-------------------|----------|-----------------|-------------|-----------------------|----------------------|------------------|--------------------------|
| GRXCR2       | 187-247       | 38.0              | Original | 3.85            | 56.37       | 1.69                  | 93.22                | 3.11             | -2673.31                 |
|              |               |                   | FFX      | 1.92            | 0.00        | 0.00                  | 93.22                | 1.15             | -2789.45                 |
|              | 195-240       | 39.4              | Original | 0.00            | 13.43       | 2.27                  | 75.00                | 2.43             | -2350.18                 |
|              |               |                   | FFX      | 0.00            | 0.00        | 2.27                  | 77.27                | 1.27             | -2442.84                 |
| GSDME(DFNA5) | 17-125        | 32.0              | Original | 2.04            | 80.16       | 0.93                  | 85.98                | 3.25             | -4572.65                 |
|              |               |                   | FFX      | 1.02            | 0.00        | 1.87                  | 87.85                | 1.11             | -4910.86                 |
| HARS2        | 55-502        | 80.0              | Original | 5.68            | 77.41       | 1.35                  | 95.29                | 3.26             | -19109.03                |
|              |               |                   | FFX      | 3.10            | 0.14        | 0.90                  | 93.05                | 1.37             | -20522.59                |
| HARS2-Dimer  | 54-502        | 77.9              | Original | 0.39            | 0.90        | 0.56                  | 96.20                | 1.03             | -41206.82                |
|              |               |                   | FFX      | 0.64            | 0.00        | 0.22                  | 97.20                | 0.65             | -42575.75                |
| HGF          | 104-723       | 28.3              | Original | 1.82            | 8.42        | 3.88                  | 85.28                | 2.31             | -26789.58                |
|              |               |                   | FFX      | 2.37            | 0.00        | 1.62                  | 90.13                | 1.33             | -28790.75                |
|              | 128-720       | 42.5              | Original | 2.48            | 3.38        | 1.86                  | 92.05                | 1.91             | -26310.95                |
|              |               |                   | FFX      | 2.10            | 0.22        | 0.51                  | 92.39                | 1.30             | -27701.16                |
|              | 200-725       | 26.8              | Original | 1.72            | 8.72        | 4.39                  | 88.17                | 2.24             | -22816.06                |
|              |               |                   | FFX      | 1.72            | 0.00        | 1.91                  | 89.50                | 1.24             | -24431.93                |
|              | 210-288       | 53.0              | Original | 1.37            | 48.45       | 0.00                  | 94.81                | 2.62             | -4183.65                 |
|              |               |                   | FFX      | 4.11            | 0.00        | 0.00                  | 93.51                | 1.39             | -4359.49                 |
|              | 210-469       | 47.8              | Original | 2.95            | 4.99        | 2.33                  | 91.47                | 2.12             | -12744.38                |
|              |               |                   | FFX      | 0.84            | 0.00        | 0.78                  | 89.92                | 1.05             | -13296.22                |
|              | 305-720       | 36.1              | Original | 1.38            | 6.38        | 3.38                  | 87.92                | 2.06             | -17517.62                |
|              |               |                   | FFX      | 0.55            | 0.16        | 0.97                  | 90.82                | 1.09             | -18807.03                |
|              | 38-722        | 40.8              | Original | 1.15            | 5.90        | 1.02                  | 92.68                | 1.83             | -30590.94                |
|              |               |                   | FFX      | 0.82            | 0.00        | 0.73                  | 92.24                | 0.98             | -32159.77                |
| HOMER2       | 1-128         | 82.0              | Original | 2.65            | 32.96       | 0.79                  | 97.62                | 2.40             | -5558.27                 |
|              |               |                   | FFX      | 1.77            | 0.00        | 0.00                  | 97.62                | 0.77             | -5877.25                 |
|              | 1-142         | 77.5              | Original | 0.00            | 0.45        | 0.00                  | 97.14                | 0.81             | -6322.14                 |
|              |               |                   | FFX      | 0.00            | 0.00        | 0.71                  | 96.43                | 0.74             | -6492.85                 |
|              | 173-301       | 15.1              | Original | 0.83            | 5.14        | 0.00                  | 97.64                | 1.35             | -7330.05                 |
|              |               |                   | FFX      | 0.00            | 0.00        | 0.00                  | 98.43                | 0.50             | -7588.77                 |
|              | 178-341       | 15.8              | Original | 0.65            | 1.45        | 1.85                  | 91.98                | 1.37             | -9254.21                 |
|              |               |                   | FFX      | 0.65            | 0.00        | 0.62                  | 90.74                | 1.03             | -9684.81                 |
|              | 179-307       | 21.7              | Original | 1.64            | 0.93        | 1.57                  | 93.70                | 1.36             | -7472.92                 |
|              |               |                   | FFX      | 1.64            | 0.00        | 0.00                  | 97.64                | 0.74             | -7738.62                 |
|              | 179-337       | 18.4              | Original | 1.32            | 4.47        | 2.55                  | 92.99                | 1.77             | -9071.76                 |
|              |               |                   | FFX      | 0.66            | 0.00        | 0.00                  | 91.72                | 1.00             | -9402.83                 |
|              | 182-345       | 17.6              | Original | 0.00            | 5.05        | 0.62                  | 95.68                | 1.57             | -9688.88                 |

| Gene            | Residue Range | Sequence Identity | Model    | % Poor Rotamers | Clash Score | Ramachandran Outliers | Ramachandran Favored | MolProbity Score | Amoeba Energy (Kcal/Mol) |
|-----------------|---------------|-------------------|----------|-----------------|-------------|-----------------------|----------------------|------------------|--------------------------|
|                 |               |                   | FFX      | 0.00            | 0.00        | 0.00                  | 96.30                | 0.75             | -9973.96                 |
|                 | 184-320       | 12.4              | Original | 1.54            | 1.74        | 0.74                  | 93.33                | 1.51             | -8141.61                 |
|                 |               |                   | FFX      | 0.77            | 0.00        | 0.00                  | 97.04                | 0.67             | -8405.78                 |
|                 | 189-316       | 10.2              | Original | 0.83            | 1.41        | 0.00                  | 96.83                | 1.07             | -7565.58                 |
|                 |               |                   | FFX      | 0.83            | 0.00        | 0.00                  | 99.21                | 0.50             | -7760.58                 |
|                 | 189-333       | 16.3              | Original | 2.17            | 0.82        | 0.70                  | 94.41                | 1.39             | -8360.12                 |
|                 |               |                   | FFX      | 0.72            | 0.00        | 0.70                  | 97.20                | 0.65             | -8658.59                 |
|                 | 218-350       | 18.9              | Original | 0.00            | 6.22        | 0.76                  | 96.95                | 1.52             | -8226.06                 |
|                 |               |                   | FFX      | 1.56            | 0.00        | 0.00                  | 99.24                | 0.65             | -8474.48                 |
| HSD17B4         | 3-304         | 92.0              | Original | 3.36            | 50.82       | 0.00                  | 98.00                | 2.58             | -12922.94                |
|                 |               |                   | FFX      | 0.84            | 0.00        | 0.33                  | 96.67                | 0.71             | -13626.82                |
| HSD17B4-Dimer   | 5-606         | 54.5              | Original | 1.35            | 3.97        | 1.92                  | 91.25                | 1.79             | -49290.79                |
|                 |               |                   | FFX      | 1.35            | 0.16        | 0.75                  | 94.17                | 1.06             | -52671.92                |
| ILDR1           | 24-155        | 18.0              | Original | 2.54            | 83.29       | 0.00                  | 92.31                | 3.17             | -5393.05                 |
|                 |               |                   | FFX      | 1.69            | 0.00        | 1.54                  | 90.00                | 1.22             | -5888.80                 |
|                 | 24-166        | 22.4              | Original | 2.33            | 8.75        | 7.80                  | 80.85                | 2.47             | -6223.82                 |
|                 |               |                   | FFX      | 2.33            | 0.00        | 2.13                  | 89.36                | 1.34             | -6551.44                 |
| KARS            | 124-595       | 20.0              | Original | 5.30            | 153.33      | 2.98                  | 91.28                | 3.71             | -20476.23                |
|                 |               |                   | FFX      | 6.27            | 0.00        | 1.06                  | 88.51                | 1.69             | -22024.15                |
| KCNE1           | 1-129         | 98.0              | Original | 3.48            | 35.44       | 0.79                  | 96.85                | 2.63             | -5157.13                 |
|                 |               |                   | FFX      | 1.74            | 0.00        | 0.00                  | 96.06                | 0.95             | -5480.14                 |
| KCNJ10          | 27-348        | 44.0              | Original | 2.12            | 88.16       | 1.25                  | 95.00                | 3.01             | -11841.26                |
|                 |               |                   | FFX      | 1.77            | 0.00        | 0.62                  | 94.38                | 1.07             | -12971.09                |
| KCNJ10-Tetramer | 26-343        | 43.1              | Original | 0.36            | 8.48        | 1.27                  | 94.70                | 1.82             | -49492.06                |
|                 |               |                   | FFX      | 1.08            | 0.20        | 0.32                  | 94.62                | 0.97             | -52624.89                |
|                 | 28-338        | 45.0              | Original | 2.47            | 3.42        | 2.02                  | 93.45                | 1.86             | -47479.16                |
|                 |               |                   | FFX      | 1.56            | 0.00        | 0.40                  | 93.69                | 1.06             | -50941.79                |
| KCNQ1           | 352-535       | 97.0              | Original | 7.14            | 45.66       | 0.55                  | 98.35                | 2.79             | -7901.49                 |
|                 |               |                   | FFX      | 2.98            | 0.00        | 0.00                  | 95.05                | 1.20             | -8417.19                 |
| KCNQ4           | 317-369       | 46.0              | Original | 2.27            | 47.03       | 0.00                  | 98.04                | 2.42             | -2222.05                 |
|                 |               |                   | FFX      | 0.00            | 0.00        | 0.00                  | 98.04                | 0.50             | -2340.36                 |
|                 | 80-328        | 24.6              | Original | 0.97            | 5.46        | 0.40                  | 96.76                | 1.50             | -8543.28                 |
|                 |               |                   | FFX      | 0.00            | 0.00        | 0.00                  | 98.79                | 0.50             | -9002.39                 |
| KITLG           | 35-166        | 80.0              | Original | 3.15            | 50.00       | 0.77                  | 96.15                | 2.82             | -5854.88                 |
|                 |               |                   | FFX      | 3.15            | 0.00        | 0.00                  | 94.62                | 1.25             | -6186.32                 |
| LARS2           | 50-902        | 37.0              | Original | 0.95            | 0.67        | 1.53                  | 92.83                | 1.17             | -35950.27                |

| Gene   | Residue Range | Sequence Identity | Model    | % Poor Rotamers | Clash Score | Ramachandran Outliers | Ramachandran Favored | MolProbity Score | Amoeba Energy (Kcal/Mol) |
|--------|---------------|-------------------|----------|-----------------|-------------|-----------------------|----------------------|------------------|--------------------------|
|        |               |                   | FFX      | 1.09            | 0.00        | 0.59                  | 93.89                | 0.94             | -37519.62                |
|        | 55-835        | 23.3              | Original | 2.24            | 0.89        | 3.08                  | 89.09                | 1.61             | -32531.02                |
|        |               |                   | FFX      | 1.79            | 0.08        | 1.67                  | 91.14                | 1.24             | -33988.55                |
|        | 60-901        | 39.0              | Original | 3.04            | 130.50      | 2.50                  | 90.00                | 3.49             | -32663.97                |
|        |               |                   | FFX      | 4.28            | 0.00        | 1.31                  | 89.29                | 1.55             | -36443.15                |
| LHFPL5 | 131-190       | 34.0              | Original | 2.17            | 57.21       | 1.72                  | 96.55                | 2.71             | -2199.09                 |
|        |               |                   | FFX      | 2.17            | 0.00        | 0.00                  | 96.55                | 0.98             | -2313.81                 |
| LOXHD1 | 1253-1371     | 32.4              | Original | 2.94            | 10.42       | 1.71                  | 93.16                | 2.33             | -5715.04                 |
|        |               |                   | FFX      | 0.00            | 0.00        | 0.85                  | 93.16                | 0.94             | -5961.18                 |
|        | 1591-1784     | 12.8              | Original | 1.16            | 14.44       | 3.12                  | 90.62                | 2.25             | -8879.86                 |
|        |               |                   | FFX      | 1.16            | 0.00        | 2.60                  | 91.15                | 1.06             | -9306.84                 |
|        | 173-281       | 35.3              | Original | 2.25            | 19.52       | 1.87                  | 73.83                | 2.86             | -5567.95                 |
|        |               |                   | FFX      | 1.12            | 0.00        | 0.93                  | 84.11                | 1.21             | -5837.29                 |
|        | 1861-2065     | 26.0              | Original | 2.22            | 3.63        | 3.45                  | 90.15                | 1.96             | -9032.35                 |
|        |               |                   | FFX      | 0.00            | 0.00        | 0.99                  | 94.09                | 0.90             | -9621.85                 |
|        | 1888-2057     | 32.7              | Original | 2.68            | 12.79       | 1.79                  | 87.50                | 2.55             | -7601.60                 |
|        |               |                   | FFX      | 0.67            | 0.00        | 0.60                  | 94.64                | 0.87             | -8028.69                 |
|        | 275-384       | 38.0              | Original | 2.13            | 82.75       | 0.93                  | 87.96                | 3.24             | -5388.92                 |
|        |               |                   | FFX      | 0.00            | 0.00        | 0.00                  | 85.19                | 1.16             | -5736.96                 |
|        | 297-430       | 32.1              | Original | 0.00            | 5.55        | 2.27                  | 93.18                | 1.74             | -5506.01                 |
|        |               |                   | FFX      | 0.00            | 0.00        | 0.76                  | 95.45                | 0.82             | -5731.04                 |
|        | 554-685       | 32.0              | Original | 0.00            | 6.80        | 2.31                  | 91.54                | 1.88             | -6692.70                 |
|        |               |                   | FFX      | 0.00            | 0.00        | 0.77                  | 93.08                | 0.94             | -6941.61                 |
|        | 781-935       | 28.9              | Original | 0.74            | 2.81        | 3.27                  | 92.16                | 1.55             | -7237.93                 |
|        |               |                   | FFX      | 2.22            | 0.00        | 0.65                  | 93.46                | 1.19             | -7516.26                 |
|        | 816-947       | 29.2              | Original | 0.00            | 9.56        | 1.54                  | 90.00                | 2.05             | -6291.13                 |
|        |               |                   | FFX      | 0.00            | 0.00        | 0.77                  | 93.85                | 0.91             | -6493.64                 |
| LOXL3  | 167-527       | 32.9              | Original | 1.41            | 9.89        | 2.51                  | 89.97                | 2.18             | -14710.24                |
|        |               |                   | FFX      | 0.70            | 0.00        | 1.67                  | 93.31                | 0.93             | -15690.38                |
|        | 184-388       | 37.8              | Original | 4.40            | 5.94        | 3.94                  | 88.67                | 2.40             | -8099.56                 |
|        |               |                   | FFX      | 1.89            | 0.00        | 1.48                  | 92.61                | 1.17             | -8609.37                 |
|        | 307-744       | 63.8              | Original | 8.31            | 3.76        | 1.15                  | 93.12                | 2.31             | -19944.74                |
|        |               |                   | FFX      | 2.22            | 0.00        | 0.69                  | 94.50                | 1.14             | -21472.74                |
|        | 42-408        | 30.5              | Original | 1.71            | 4.38        | 4.93                  | 83.56                | 2.08             | -15337.46                |
|        |               |                   | FFX      | 1.37            | 0.00        | 3.29                  | 89.04                | 1.18             | -16396.54                |
|        | 43-144        | 48.0              | Original | 2.47            | 80.13       | 4.00                  | 93.00                | 3.12             | -4605.90                 |
|        |               |                   | FFX      | 2.47            | 0.00        | 1.00                  | 93.00                | 1.25             | -4830.31                 |

| Gene       | Residue Range | Sequence Identity | Model    | % Poor Rotamers | Clash Score | Ramachandran Outliers | Ramachandran Favored | MolProbity Score | Amoeba Energy (Kcal/Mol) |
|------------|---------------|-------------------|----------|-----------------|-------------|-----------------------|----------------------|------------------|--------------------------|
| LRTOMT     | 118-287       | 26.4              | Original | 0.72            | 2.23        | 1.79                  | 92.86                | 1.45             | -6833.86                 |
|            |               |                   | FFX      | 3.60            | 0.00        | 1.19                  | 92.26                | 1.40             | -7112.79                 |
|            | 75-290        | 39.3              | Original | 0.00            | 5.61        | 0.00                  | 94.86                | 1.66             | -8886.91                 |
|            |               |                   | FFX      | 0.56            | 0.00        | 0.93                  | 95.79                | 0.79             | -9250.56                 |
|            | 76-290        | 37.7              | Original | 0.00            | 2.66        | 0.47                  | 94.84                | 1.41             | -8725.89                 |
|            |               |                   | FFX      | 1.13            | 0.00        | 0.47                  | 96.71                | 0.75             | -9040.89                 |
|            | 77-290        | 38.6              | Original | 0.00            | 4.17        | 0.47                  | 92.45                | 1.67             | -8760.98                 |
|            |               |                   | FFX      | 1.14            | 0.00        | 0.47                  | 95.28                | 0.87             | -9099.92                 |
|            | 79-291        | 39.0              | Original | 1.15            | 86.07       | 0.95                  | 95.73                | 2.74             | -8470.37                 |
|            |               |                   | FFX      | 4.60            | 0.00        | 0.95                  | 94.31                | 1.39             | -9039.09                 |
| MARVELD2   | 442-551       | 30.0              | Original | 1.90            | 62.63       | 0.93                  | 98.15                | 2.48             | -6246.62                 |
|            |               |                   | FFX      | 3.81            | 0.00        | 1.85                  | 96.30                | 1.19             | -6593.96                 |
| MCM2       | 189-821       | 52.3              | Original | 0.73            | 3.02        | 1.90                  | 91.28                | 1.60             | -27240.82                |
|            |               |                   | FFX      | 2.20            | 0.00        | 1.27                  | 92.23                | 1.24             | -28883.93                |
|            | 192-805       | 37.1              | Original | 3.02            | 1.04        | 1.14                  | 90.85                | 1.69             | -27107.95                |
|            |               |                   | FFX      | 1.89            | 0.00        | 0.98                  | 92.97                | 1.16             | -28427.32                |
|            | 199-798       | 39.0              | Original | 4.26            | 92.25       | 1.51                  | 95.32                | 3.24             | -25159.52                |
|            |               |                   | FFX      | 1.55            | 0.00        | 1.00                  | 92.64                | 1.11             | -27492.89                |
| MET        | 1082-1380     | 39.0              | Original | 1.13            | 100.40      | 2.02                  | 94.28                | 2.90             | -12426.36                |
|            |               |                   | FFX      | 1.89            | 0.00        | 1.68                  | 91.25                | 1.22             | -13390.96                |
|            | 44-919        | 25.6              | Original | 1.77            | 4.10        | 4.81                  | 85.47                | 2.03             | -34865.68                |
|            |               |                   | FFX      | 1.52            | 0.00        | 1.26                  | 89.70                | 1.20             | -37452.36                |
| MITF       | 323-402       | 96.0              | Original | 4.11            | 35.23       | 0.00                  | 100.00               | 2.50             | -4301.54                 |
|            |               |                   | FFX      | 0.00            | 0.00        | 0.00                  | 98.72                | 0.50             | -4477.61                 |
| MITF-Dimer | 324-402       | 97.5              | Original | 0.00            | 0.37        | 0.00                  | 99.35                | 0.63             | -8691.33                 |
|            |               |                   | FFX      | 0.00            | 0.00        | 0.00                  | 98.70                | 0.50             | -8958.68                 |
| MSRB3      | 36-171        | 53.7              | Original | 6.72            | 7.20        | 5.97                  | 78.36                | 2.78             | -6116.73                 |
|            |               |                   | FFX      | 3.36            | 0.00        | 2.24                  | 85.07                | 1.56             | -6440.73                 |
|            | 41-167        | 58.0              | Original | 2.70            | 47.37       | 0.00                  | 96.00                | 2.76             | -5823.79                 |
|            |               |                   | FFX      | 2.70            | 0.00        | 0.00                  | 95.20                | 1.16             | -6074.23                 |
| MYH14      | 15-863        | 46.8              | Original | 6.79            | 1.54        | 1.77                  | 92.80                | 1.99             | -36828.72                |
|            |               |                   | FFX      | 1.39            | 0.00        | 1.18                  | 94.69                | 0.97             | -39251.64                |
|            | 17-863        | 46.8              | Original | 6.94            | 1.84        | 2.25                  | 92.54                | 2.05             | -36762.29                |
|            |               |                   | FFX      | 1.94            | 0.00        | 1.30                  | 94.20                | 1.11             | -39080.37                |
|            | 18-863        | 47.2              | Original | 5.01            | 0.96        | 2.49                  | 91.47                | 1.82             | -37086.67                |
|            |               |                   | FFX      | 1.53            | 0.00        | 0.95                  | 93.84                | 1.05             | -39116.26                |
|            | 18-983        | 38.4              | Original | 1.47            | 1.16        | 3.63                  | 86.72                | 1.58             | -42927.11                |

| Gene | Residue Range | Sequence Identity | Model    | % Poor Rotamers | Clash Score | Ramachandran Outliers | Ramachandran Favored | MolProbity Score | Amoeba Energy (Kcal/Mol) |
|------|---------------|-------------------|----------|-----------------|-------------|-----------------------|----------------------|------------------|--------------------------|
|      |               |                   | FFX      | 0.98            | 0.00        | 1.97                  | 92.32                | 0.97             | -45619.24                |
|      | 18-985        | 38.4              | Original | 2.32            | 1.68        | 3.52                  | 86.44                | 1.83             | -43098.83                |
|      |               |                   | FFX      | 1.46            | 0.13        | 1.86                  | 90.99                | 1.20             | -45878.51                |
|      | 21-860        | 50.0              | Original | 6.44            | 5.28        | 2.74                  | 89.62                | 2.46             | -33826.45                |
|      |               |                   | FFX      | 4.20            | 0.00        | 1.43                  | 92.48                | 1.44             | -38511.85                |
|      | 21-862        | 49.9              | Original | 2.37            | 2.82        | 1.90                  | 92.98                | 1.80             | -37322.04                |
|      |               |                   | FFX      | 1.26            | 0.00        | 1.07                  | 94.29                | 0.96             | -39078.35                |
|      | 22-947        | 69.3              | Original | 1.28            | 1.48        | 1.52                  | 92.86                | 1.42             | -41912.86                |
|      |               |                   | FFX      | 0.77            | 0.07        | 1.08                  | 94.59                | 0.90             | -43756.53                |
|      | 22-954        | 68.8              | Original | 6.20            | 0.33        | 1.83                  | 92.91                | 1.68             | -42074.66                |
|      |               |                   | FFX      | 2.03            | 0.00        | 0.75                  | 96.03                | 1.01             | -44297.87                |
|      | 24-983        | 68.3              | Original | 6.39            | 1.04        | 2.30                  | 89.67                | 1.97             | -43333.54                |
|      |               |                   | FFX      | 2.70            | 0.00        | 1.25                  | 93.32                | 1.26             | -45836.83                |
|      | 46-832        | 76.0              | Original | 4.91            | 110.75      | 2.55                  | 91.46                | 3.54             | -33827.51                |
|      |               |                   | FFX      | 3.42            | 0.16        | 1.27                  | 92.74                | 1.43             | -36806.16                |
|      | 804-955       | 17.5              | Original | 0.00            | 0.80        | 4.00                  | 90.67                | 1.28             | -7308.23                 |
|      |               |                   | FFX      | 0.00            | 0.00        | 2.00                  | 96.00                | 0.77             | -7614.00                 |
|      | 804-957       | 17.5              | Original | 1.56            | 3.15        | 1.97                  | 91.45                | 1.76             | -7430.33                 |
|      |               |                   | FFX      | 0.00            | 0.00        | 0.66                  | 97.37                | 0.62             | -7775.44                 |
| MYH9 | 1-895         | 83.5              | Original | 6.91            | 0.41        | 1.34                  | 93.06                | 1.73             | -40874.20                |
|      |               |                   | FFX      | 2.56            | 0.00        | 0.34                  | 95.18                | 1.15             | -43224.10                |
|      | 3-836         | 52.3              | Original | 7.16            | 2.73        | 1.92                  | 91.35                | 2.22             | -37113.74                |
|      |               |                   | FFX      | 3.99            | 0.00        | 1.20                  | 93.27                | 1.39             | -39398.78                |
|      | 3-838         | 52.4              | Original | 2.20            | 1.77        | 1.68                  | 94.12                | 1.59             | -37995.78                |
|      |               |                   | FFX      | 0.96            | 0.00        | 0.60                  | 95.08                | 0.84             | -39856.15                |
|      | 3-839         | 49.1              | Original | 4.39            | 1.40        | 1.44                  | 92.93                | 1.81             | -37891.89                |
|      |               |                   | FFX      | 2.47            | 0.00        | 0.72                  | 95.57                | 1.11             | -39763.09                |
|      | 3-930         | 80.0              | Original | 13.70           | 1.79        | 1.30                  | 92.76                | 2.26             | -42488.88                |
|      |               |                   | FFX      | 1.23            | 0.00        | 0.54                  | 95.36                | 0.89             | -45482.92                |
|      | 3-959         | 78.7              | Original | 8.60            | 1.03        | 2.30                  | 89.53                | 2.07             | -44553.71                |
|      |               |                   | FFX      | 3.70            | 0.00        | 0.73                  | 93.72                | 1.35             | -46912.41                |
|      | 3-961         | 41.4              | Original | 3.34            | 0.71        | 2.40                  | 88.30                | 1.72             | -44363.09                |
|      |               |                   | FFX      | 1.67            | 0.00        | 1.67                  | 92.27                | 1.15             | -47112.65                |
|      | 4-822         | 81.8              | Original | 0.98            | 0.45        | 0.73                  | 94.86                | 1.01             | -37633.44                |
|      |               |                   | FFX      | 0.70            | 0.00        | 0.24                  | 95.10                | 0.84             | -39341.73                |
|      | 6-808         | 84.0              | Original | 3.72            | 81.41       | 1.50                  | 92.38                | 3.29             | -35717.79                |
|      |               |                   | FFX      | 2.87            | 0.00        | 0.62                  | 95.26                | 1.18             | -38513.52                |

| Gene      | Residue Range | Sequence Identity | Model    | % Poor Rotamers | Clash Score | Ramachandran Outliers | Ramachandran Favored | MolProbity Score | Amoeba Energy (Kcal/Mol) |
|-----------|---------------|-------------------|----------|-----------------|-------------|-----------------------|----------------------|------------------|--------------------------|
| MYO15A    | 1215-1973     | 39.7              | Original | 1.20            | 2.51        | 1.45                  | 94.06                | 1.49             | -32732.14                |
|           |               |                   | FFX      | 0.30            | 0.08        | 0.40                  | 94.98                | 0.88             | -34414.53                |
|           | 1217-1946     | 43.3              | Original | 0.47            | 3.30        | 1.24                  | 94.51                | 1.50             | -31766.64                |
|           |               |                   | FFX      | 1.25            | 0.00        | 0.69                  | 95.60                | 0.88             | -32980.55                |
|           | 1217-1949     | 37.7              | Original | 1.86            | 2.19        | 2.05                  | 92.61                | 1.66             | -31584.53                |
|           |               |                   | FFX      | 0.78            | 0.00        | 0.82                  | 94.80                | 0.86             | -33085.18                |
|           | 1217-1960     | 35.3              | Original | 1.98            | 2.73        | 1.75                  | 94.47                | 1.66             | -31898.35                |
|           |               |                   | FFX      | 1.07            | 0.00        | 0.81                  | 94.61                | 0.89             | -33583.03                |
|           | 1217-1971     | 38.5              | Original | 3.16            | 4.39        | 2.39                  | 92.16                | 2.08             | -32178.53                |
|           |               |                   | FFX      | 1.05            | 0.08        | 1.06                  | 93.76                | 0.96             | -33927.40                |
|           | 1217-1976     | 38.3              | Original | 5.83            | 1.69        | 4.49                  | 87.07                | 2.12             | -31936.39                |
|           |               |                   | FFX      | 2.39            | 0.08        | 0.92                  | 91.42                | 1.33             | -34070.24                |
|           | 1224-1898     | 44.0              | Original | 2.69            | 110.88      | 3.57                  | 91.68                | 3.33             | -27856.11                |
|           |               |                   | FFX      | 3.87            | 0.00        | 2.08                  | 91.38                | 1.45             | -30070.82                |
| 1224-1972 | 41.5          | Original          | 3.33     | 1.80            | 2.14        | 91.03                 | 1.85                 | -31233.69        |                          |
|           |               | FFX               | 1.82     | 0.00            | 0.94        | 93.44                 | 1.13                 | -33390.91        |                          |
| MYO3A     | 293-1084      | 36.4              | Original | 1.56            | 7.09        | 1.90                  | 92.15                | 2.02             | -34859.62                |
|           |               |                   | FFX      | 0.71            | 0.00        | 1.01                  | 94.43                | 0.88             | -36639.40                |
|           | 337-1105      | 35.2              | Original | 4.54            | 3.86        | 2.74                  | 91.00                | 2.19             | -32598.46                |
|           |               |                   | FFX      | 3.66            | 0.00        | 1.04                  | 93.48                | 1.36             | -35047.45                |
|           | 337-1121      | 31.7              | Original | 2.44            | 1.81        | 2.81                  | 91.19                | 1.75             | -34283.28                |
|           |               |                   | FFX      | 1.00            | 0.00        | 0.89                  | 94.51                | 0.88             | -36029.26                |
|           | 337-1134      | 33.5              | Original | 1.55            | 0.93        | 1.38                  | 93.22                | 1.36             | -35604.20                |
|           |               |                   | FFX      | 0.84            | 0.08        | 0.50                  | 95.23                | 0.86             | -37039.84                |
|           | 337-1141      | 34.2              | Original | 2.23            | 2.15        | 2.37                  | 91.41                | 1.76             | -35112.19                |
|           |               |                   | FFX      | 1.81            | 0.00        | 0.62                  | 93.52                | 1.12             | -37088.28                |
|           | 337-1144      | 34.3              | Original | 4.87            | 4.13        | 2.73                  | 88.59                | 2.30             | -34309.50                |
|           |               |                   | FFX      | 1.25            | 0.00        | 0.87                  | 92.43                | 1.04             | -37189.39                |
|           | 341-1141      | 36.4              | Original | 1.68            | 3.01        | 1.88                  | 91.99                | 1.75             | -34880.48                |
|           |               |                   | FFX      | 0.98            | 0.00        | 0.38                  | 94.99                | 0.85             | -36959.65                |
| 9-292     | 53.0          | Original          | 4.40     | 75.40           | 0.71        | 93.62                 | 3.26                 | -12719.88        |                          |
|           |               | FFX               | 4.80     | 0.22            | 0.35        | 93.26                 | 1.54                 | -13445.29        |                          |
| MYO6      | 1-768         | 41.0              | Original | 3.55            | 122.72      | 1.96                  | 93.34                | 3.40             | -33402.75                |
|           |               |                   | FFX      | 2.36            | 0.00        | 0.91                  | 92.95                | 1.23             | -36924.83                |
|           | 1166-1294     | 94.6              | Original | 26.79           | 3.72        | 4.72                  | 84.25                | 2.92             | -5982.26                 |
|           |               |                   | FFX      | 5.36            | 0.00        | 0.79                  | 92.91                | 1.51             | -6479.49                 |
|           | 2-825         | 98.3              | Original | 7.26            | 0.45        | 0.49                  | 97.08                | 1.48             | -38294.58                |

| Gene        | Residue Range | Sequence Identity | Model    | % Poor Rotamers | Clash Score | Ramachandran Outliers | Ramachandran Favored | MolProbity Score | Amoeba Energy (Kcal/Mol) |
|-------------|---------------|-------------------|----------|-----------------|-------------|-----------------------|----------------------|------------------|--------------------------|
|             | 4-819         | 97.9              | FFX      | 1.23            | 0.00        | 0.49                  | 96.72                | 0.78             | -40215.77                |
|             |               |                   | Original | 4.16            | 1.37        | 0.61                  | 96.07                | 1.61             | -37813.07                |
|             | 61-833        | 42.0              | FFX      | 1.11            | 0.00        | 0.25                  | 96.68                | 0.74             | -39722.30                |
|             |               |                   | Original | 6.55            | 139.62      | 3.63                  | 90.79                | 3.75             | -14162.08                |
| MYO7A       | 2-792         | 36.4              | FFX      | 3.49            | 0.16        | 1.69                  | 91.05                | 1.49             | -36786.67                |
|             |               |                   | Original | 5.29            | 2.74        | 2.28                  | 92.27                | 2.09             | -34567.67                |
|             | 2-800         | 36.2              | FFX      | 3.15            | 0.00        | 0.89                  | 93.79                | 1.29             | -36594.65                |
|             |               |                   | Original | 1.13            | 4.10        | 1.00                  | 93.98                | 1.64             | -35215.32                |
|             | 3-800         | 36.9              | FFX      | 1.42            | 0.00        | 0.50                  | 96.24                | 0.87             | -37243.87                |
|             |               |                   | Original | 6.68            | 5.35        | 2.51                  | 91.21                | 2.43             | -34400.84                |
|             | 3-801         | 36.6              | FFX      | 1.14            | 0.00        | 1.13                  | 92.96                | 0.99             | -37168.60                |
|             |               |                   | Original | 6.38            | 3.64        | 2.01                  | 90.84                | 2.29             | -34816.36                |
|             | 3-859         | 40.1              | FFX      | 1.42            | 0.00        | 0.88                  | 94.10                | 1.01             | -37198.43                |
|             |               |                   | Original | 1.72            | 2.15        | 0.70                  | 94.04                | 1.57             | -38082.79                |
|             | 35-861        | 42.8              | FFX      | 0.80            | 0.07        | 0.70                  | 96.49                | 0.76             | -39912.59                |
|             |               |                   | Original | 1.79            | 2.15        | 0.97                  | 93.45                | 1.61             | -36245.95                |
|             | 56-874        | 40.1              | FFX      | 0.69            | 0.00        | 0.61                  | 96.73                | 0.71             | -38554.77                |
|             |               |                   | Original | 3.47            | 0.74        | 2.33                  | 90.82                | 1.67             | -36058.68                |
|             | 993-1686      | 98.0              | FFX      | 0.69            | 0.07        | 0.49                  | 94.61                | 0.90             | -37787.06                |
|             |               |                   | Original | 4.49            | 66.25       | 0.58                  | 96.10                | 3.05             | -28861.43                |
| NARS2       | 28-476        | 35.0              | FFX      | 2.66            | 0.00        | 0.14                  | 95.52                | 1.13             | -31460.80                |
|             |               |                   | Original | 4.31            | 109.51      | 2.46                  | 90.38                | 3.53             | -18930.09                |
| NARS2-Dimer | 24-476        | 30.5              | FFX      | 2.54            | 0.00        | 0.89                  | 91.05                | 1.33             | -20500.29                |
|             |               |                   | Original | 0.63            | 8.26        | 2.00                  | 91.01                | 1.97             | -39334.62                |
|             | 3-474         | 18.9              | FFX      | 1.26            | 0.07        | 1.44                  | 92.90                | 1.06             | -41771.93                |
|             |               |                   | Original | 1.33            | 3.66        | 1.49                  | 89.15                | 1.82             | -40516.60                |
| NLRP3       | 699-1031      | 39.2              | FFX      | 1.69            | 0.00        | 1.17                  | 90.64                | 1.20             | -43131.52                |
|             |               |                   | Original | 1.67            | 8.70        | 0.00                  | 95.17                | 1.97             | -13151.50                |
|             | 725-897       | 48.0              | FFX      | 2.00            | 0.00        | 0.30                  | 95.17                | 1.06             | -13800.50                |
|             |               |                   | Original | 0.65            | 65.32       | 1.75                  | 97.08                | 2.45             | -6555.98                 |
| OPA1        | 262-707       | 22.4              | FFX      | 1.31            | 0.00        | 0.58                  | 97.66                | 0.66             | -7059.46                 |
|             |               |                   | Original | 0.75            | 5.48        | 1.35                  | 91.89                | 1.79             | -20127.19                |
|             | 262-709       | 26.5              | FFX      | 1.00            | 0.14        | 1.13                  | 93.69                | 0.97             | -21168.48                |
|             |               |                   | Original | 0.50            | 6.44        | 1.57                  | 94.84                | 1.71             | -20217.92                |
| 272-577     | 27.0          | FFX               | 1.73     | 0.00            | 0.45        | 94.39                 | 1.06                 | -21382.78        |                          |
|             |               | Original          | 2.59     | 112.97          | 2.30        | 93.09                 | 3.28                 | -12921.66        |                          |
|             |               |                   | FFX      | 2.59            | 0.00        | 0.66                  | 93.75                | 1.23             | -13886.11                |

| Gene          | Residue Range | Sequence Identity | Model    | % Poor Rotamers | Clash Score | Ramachandran Outliers | Ramachandran Favored | MolProbity Score | Amoeba Energy (Kcal/Mol) |
|---------------|---------------|-------------------|----------|-----------------|-------------|-----------------------|----------------------|------------------|--------------------------|
| OPA1-Dimer    | 261-706       | 24.7              | Original | 1.00            | 5.27        | 2.25                  | 92.22                | 1.76             | -39892.72                |
|               |               |                   | FFX      | 0.87            | 0.14        | 0.79                  | 93.91                | 0.96             | -42168.82                |
| OPA1-Tetramer | 262-707       | 23.7              | Original | 1.43            | 5.45        | 1.91                  | 92.06                | 1.90             | -80139.24                |
|               |               |                   | FFX      | 0.81            | 1.76        | 0.90                  | 93.02                | 1.38             | -83370.60                |
| OSBPL2        | 59-480        | 35.5              | Original | 1.86            | 2.35        | 2.14                  | 92.38                | 1.69             | -19582.91                |
|               |               |                   | FFX      | 2.13            | 0.00        | 1.19                  | 91.90                | 1.24             | -20470.55                |
|               | 60-480        | 38.0              | Original | 2.67            | 105.26      | 3.58                  | 90.21                | 3.35             | -18445.66                |
|               |               |                   | FFX      | 1.60            | 0.29        | 1.67                  | 88.78                | 1.35             | -20083.10                |
| 84-116        | 36.4          | Original          | 0.00     | 7.29            | 3.23        | 77.42                 | 2.17                 | -1363.63         |                          |
|               |               | FFX               | 0.00     | 0.00            | 3.23        | 93.55                 | 0.92                 | -1428.61         |                          |
| OTOA          | 1-533         | 14.0              | Original | 3.40            | 137.94      | 1.32                  | 93.97                | 3.41             | -20815.35                |
|               |               |                   | FFX      | 4.26            | 0.12        | 0.94                  | 93.79                | 1.44             | -22702.08                |
| OTOF          | 1-124         | 91.0              | Original | 2.65            | 46.12       | 0.82                  | 95.08                | 2.80             | -5804.22                 |
|               |               |                   | FFX      | 2.65            | 0.00        | 0.00                  | 95.90                | 1.10             | -6024.71                 |
|               | 250-542       | 18.4              | Original | 3.05            | 11.43       | 2.75                  | 89.35                | 2.51             | -12824.48                |
|               |               |                   | FFX      | 2.67            | 0.00        | 2.06                  | 89.69                | 1.38             | -13566.43                |
|               | 251-543       | 24.2              | Original | 0.00            | 3.67        | 4.81                  | 83.85                | 1.84             | -12738.80                |
|               |               |                   | FFX      | 1.91            | 0.00        | 2.41                  | 87.97                | 1.31             | -13388.82                |
|               | 950-1095      | 19.4              | Original | 1.60            | 16.47       | 3.47                  | 86.81                | 2.50             | -6301.44                 |
|               |               |                   | FFX      | 0.00            | 0.00        | 4.17                  | 89.58                | 1.06             | -6578.52                 |
| 951-1226      | 22.9          | Original          | 0.42     | 5.25            | 5.47        | 86.13                 | 1.92                 | -11426.39        |                          |
|               |               | FFX               | 0.00     | 0.00            | 1.46        | 92.70                 | 0.96                 | -12051.09        |                          |
| OTOG          | 1244-1398     | 17.5              | Original | 1.63            | 5.42        | 0.65                  | 94.12                | 1.85             | -6253.09                 |
|               |               |                   | FFX      | 0.81            | 0.00        | 0.00                  | 96.73                | 0.70             | -6486.41                 |
|               | 1285-1398     | 19.6              | Original | 0.00            | 8.92        | 0.89                  | 91.96                | 1.97             | -4760.31                 |
|               |               |                   | FFX      | 1.09            | 0.00        | 0.00                  | 95.54                | 0.84             | -4926.79                 |
|               | 1880-2032     | 21.8              | Original | 2.61            | 9.37        | 3.97                  | 86.09                | 2.45             | -4972.10                 |
|               |               |                   | FFX      | 1.74            | 0.00        | 1.99                  | 86.09                | 1.32             | -5309.56                 |
|               | 408-511       | 33.7              | Original | 5.68            | 2.05        | 2.94                  | 83.33                | 2.24             | -4088.90                 |
|               |               |                   | FFX      | 0.00            | 0.00        | 0.98                  | 91.18                | 1.01             | -4371.26                 |
|               | 768-877       | 30.5              | Original | 5.43            | 4.65        | 7.41                  | 85.19                | 2.45             | -4836.07                 |
|               |               |                   | FFX      | 3.26            | 0.00        | 2.78                  | 91.67                | 1.39             | -5066.96                 |
|               | 906-982       | 47.0              | Original | 4.48            | 78.36       | 0.00                  | 96.00                | 3.13             | -2999.11                 |
|               |               |                   | FFX      | 5.97            | 0.00        | 0.00                  | 97.33                | 1.22             | -3184.02                 |
| OTOGL         | 1242-1352     | 27.3              | Original | 1.00            | 5.03        | 0.92                  | 93.58                | 1.69             | -5058.92                 |
|               |               |                   | FFX      | 1.00            | 0.00        | 0.92                  | 96.33                | 0.75             | -5255.68                 |
|               | 394-470       | 38.7              | Original | 10.45           | 7.51        | 5.33                  | 86.67                | 2.81             | -3138.40                 |



| Gene         | Residue Range | Sequence Identity | Model    | % Poor Rotamers | Clash Score | Ramachandran Outliers | Ramachandran Favored | MolProbity Score | Amoeba Energy (Kcal/Mol) |
|--------------|---------------|-------------------|----------|-----------------|-------------|-----------------------|----------------------|------------------|--------------------------|
|              |               |                   | FFX      | 1.49            | 0.00        | 1.33                  | 93.33                | 1.07             | -3315.85                 |
|              | 480-602       | 13.0              | Original | 0.00            | 10.20       | 3.31                  | 90.08                | 2.08             | -4681.90                 |
|              |               |                   | FFX      | 0.93            | 0.00        | 1.65                  | 85.95                | 1.14             | -4924.05                 |
|              | 724-827       | 27.8              | Original | 5.32            | 4.61        | 3.92                  | 88.24                | 2.38             | -4142.00                 |
|              |               |                   | FFX      | 2.13            | 0.00        | 1.96                  | 86.27                | 1.39             | -4399.41                 |
|              | 846-935       | 42.5              | Original | 10.39           | 3.11        | 10.23                 | 76.14                | 2.66             | -3161.11                 |
|              |               |                   | FFX      | 2.60            | 0.00        | 1.14                  | 85.23                | 1.47             | -3344.74                 |
| P2RX2        | 120-178       | 56.0              | Original | 4.08            | 82.64       | 0.00                  | 98.25                | 2.85             | -2370.78                 |
|              |               |                   | FFX      | 0.00            | 0.00        | 0.00                  | 94.74                | 0.86             | -2504.03                 |
| P2RX2-Trimer | 25-381        | 51.7              | Original | 0.75            | 4.84        | 0.56                  | 94.84                | 1.61             | -43180.54                |
|              |               |                   | FFX      | 0.54            | 0.00        | 0.28                  | 93.43                | 0.93             | -45458.83                |
| PAX3         | 111-274       | 21.6              | Original | 1.36            | 0.37        | 3.09                  | 87.04                | 1.36             | -8938.18                 |
|              |               |                   | FFX      | 0.68            | 0.00        | 0.00                  | 94.44                | 0.88             | -9344.49                 |
|              | 112-272       | 24.5              | Original | 1.39            | 6.87        | 2.52                  | 85.53                | 2.14             | -8746.00                 |
|              |               |                   | FFX      | 2.78            | 0.00        | 1.89                  | 93.08                | 1.28             | -9164.32                 |
|              | 112-276       | 24.5              | Original | 4.73            | 6.26        | 4.91                  | 86.50                | 2.49             | -8950.34                 |
|              |               |                   | FFX      | 1.35            | 0.00        | 1.23                  | 92.02                | 1.08             | -9401.07                 |
|              | 124-277       | 21.9              | Original | 4.38            | 4.77        | 4.61                  | 88.82                | 2.31             | -8297.61                 |
|              |               |                   | FFX      | 2.19            | 0.00        | 0.00                  | 95.39                | 1.08             | -8708.82                 |
|              | 295-476       | 10.0              | Original | 0.61            | 92.78       | 3.33                  | 89.44                | 3.00             | -5896.49                 |
|              |               |                   | FFX      | 2.44            | 0.00        | 3.33                  | 86.67                | 1.42             | -6548.27                 |
|              | 34-162        | 71.1              | Original | 4.39            | 2.90        | 3.15                  | 83.46                | 2.25             | -5572.81                 |
|              |               |                   | FFX      | 1.75            | 0.00        | 1.57                  | 88.19                | 1.28             | -5797.47                 |
|              | 35-158        | 78.7              | Original | 6.36            | 1.01        | 1.64                  | 92.62                | 1.87             | -5378.74                 |
|              |               |                   | FFX      | 1.82            | 0.00        | 0.82                  | 96.72                | 0.90             | -5637.72                 |
|              | 37-161        | 69.3              | Original | 1.79            | 0.00        | 0.00                  | 95.93                | 0.97             | -5513.05                 |
|              |               |                   | FFX      | 1.79            | 0.00        | 0.00                  | 99.19                | 0.69             | -5738.66                 |
| PCDH15       | 1140-1405     | 95.0              | Original | 0.00            | 0.23        | 0.00                  | 95.08                | 0.93             | -11351.62                |
|              |               |                   | FFX      | 1.30            | 0.00        | 0.00                  | 95.83                | 0.87             | -11966.15                |
|              | 1804-1836     | 56.0              | Original | 0.00            | 29.41       | 0.00                  | 100.00               | 1.95             | -824.47                  |
|              |               |                   | FFX      | 12.90           | 0.00        | 0.00                  | 96.77                | 1.54             | -863.96                  |
|              | 380-814       | 30.2              | Original | 0.26            | 4.81        | 1.62                  | 92.61                | 1.71             | -19590.68                |
|              |               |                   | FFX      | 0.79            | 0.15        | 0.92                  | 93.30                | 0.99             | -20467.96                |
|              | 398-812       | 93.5              | Original | 3.61            | 0.79        | 0.48                  | 94.67                | 1.54             | -19582.55                |
|              |               |                   | FFX      | 1.39            | 0.00        | 0.00                  | 93.70                | 1.03             | -20371.44                |
| PCDH15-Dimer | 28-387        | 97.5              | Original | 0.62            | 0.62        | 0.00                  | 98.32                | 0.70             | -36577.40                |
|              |               |                   | FFX      | 0.77            | 0.00        | 0.28                  | 97.49                | 0.60             | -37684.46                |

| Gene                        | Residue Range | Sequence Identity | Model    | % Poor Rotamers | Clash Score | Ramachandran Outliers | Ramachandran Favored | MolProbity Score | Amoeba Energy (Kcal/Mol) |
|-----------------------------|---------------|-------------------|----------|-----------------|-------------|-----------------------|----------------------|------------------|--------------------------|
|                             | 337-756       | 34.9              | Original | 0.96            | 5.37        | 3.11                  | 89.00                | 1.86             | -37557.11                |
|                             |               |                   | FFX      | 1.64            | 0.08        | 1.32                  | 91.87                | 1.19             | -39943.43                |
|                             | 400-918       | 27.1              | Original | 1.77            | 1.95        | 2.61                  | 90.04                | 1.70             | -44213.41                |
|                             |               |                   | FFX      | 1.66            | 0.00        | 1.45                  | 91.97                | 1.16             | -46932.94                |
|                             | 509-1034      | 22.0              | Original | 1.55            | 5.46        | 3.24                  | 88.36                | 2.03             | -43488.41                |
|                             |               |                   | FFX      | 1.99            | 0.00        | 1.62                  | 92.94                | 1.18             | -46428.23                |
|                             | 545-1026      | 30.8              | Original | 0.84            | 8.18        | 2.40                  | 89.90                | 2.00             | -39401.63                |
|                             |               |                   | FFX      | 1.57            | 0.00        | 1.25                  | 90.62                | 1.18             | -42360.67                |
|                             | 621-1136      | 26.3              | Original | 0.34            | 7.19        | 1.46                  | 92.70                | 1.86             | -42060.04                |
|                             |               |                   | FFX      | 0.89            | 0.00        | 1.36                  | 92.12                | 0.98             | -45169.74                |
|                             | 816-1357      | 95.0              | Original | 0.42            | 0.47        | 0.56                  | 95.09                | 1.00             | -45197.19                |
|                             |               |                   | FFX      | 1.16            | 0.12        | 0.28                  | 94.07                | 0.99             | -48093.70                |
| PCDH15-Heteromer            | 623-1139      | 24.8              | Original | 2.42            | 9.20        | 4.52                  | 86.03                | 2.42             | -39595.14                |
|                             |               |                   | FFX      | 2.42            | 0.00        | 2.31                  | 89.39                | 1.36             | -42772.42                |
| PDZD7                       | 4-294         | 27.0              | Original | 3.32            | 10.52       | 3.46                  | 89.27                | 2.51             | -11934.29                |
|                             |               |                   | FFX      | 2.07            | 0.00        | 1.38                  | 91.70                | 1.24             | -12704.20                |
|                             | 76-170        | 94.0              | Original | 0.00            | 74.89       | 1.08                  | 92.47                | 2.81             | -3967.22                 |
|                             |               |                   | FFX      | 0.00            | 0.00        | 1.08                  | 95.70                | 0.80             | -4269.21                 |
|                             | 83-293        | 33.0              | Original | 1.14            | 7.81        | 3.83                  | 86.12                | 2.11             | -9072.93                 |
|                             |               |                   | FFX      | 2.27            | 0.00        | 0.00                  | 91.87                | 1.26             | -9474.97                 |
|                             | 84-292        | 28.3              | Original | 0.00            | 6.01        | 4.35                  | 87.92                | 1.93             | -8950.79                 |
|                             |               |                   | FFX      | 0.00            | 0.00        | 0.97                  | 89.86                | 1.05             | -9429.77                 |
|                             | 85-293        | 22.7              | Original | 2.87            | 10.11       | 5.31                  | 83.57                | 2.56             | -8877.05                 |
|                             |               |                   | FFX      | 2.30            | 0.00        | 1.93                  | 90.82                | 1.30             | -9456.83                 |
| PEX1                        | 13-179        | 89.0              | Original | 2.08            | 33.67       | 0.00                  | 97.58                | 2.34             | -6813.34                 |
|                             |               |                   | FFX      | 1.39            | 0.00        | 0.61                  | 93.94                | 1.01             | -7102.25                 |
|                             | 405-1063      | 27.5              | Original | 2.41            | 3.25        | 3.04                  | 91.02                | 1.93             | -27332.24                |
|                             |               |                   | FFX      | 2.59            | 0.10        | 0.46                  | 94.37                | 1.24             | -29076.06                |
| PEX1-Hexamer(*used monomer) | 405-1064      | 28.0              | Original | 2.75            | 0.76        | 4.26                  | 86.02                | 1.72             | -26998.71                |
|                             |               |                   | FFX      | 1.55            | 0.00        | 1.06                  | 88.45                | 1.23             | -28770.29                |
| PEX6                        | 202-975       | 29.3              | Original | 2.20            | 5.11        | 3.76                  | 87.82                | 2.13             | -30173.01                |
|                             |               |                   | FFX      | 2.51            | 0.00        | 2.07                  | 90.80                | 1.33             | -32131.23                |
|                             | 203-976       | 27.3              | Original | 1.72            | 15.06       | 3.76                  | 89.90                | 2.41             | -29687.16                |
|                             |               |                   | FFX      | 2.51            | 0.09        | 1.94                  | 91.19                | 1.35             | -32408.08                |

| Gene                        | Residue Range | Sequence Identity | Model    | % Poor Rotamers | Clash Score | Ramachandran Outliers | Ramachandran Favored | MolProbity Score | Amoeba Energy (Kcal/Mol) |
|-----------------------------|---------------|-------------------|----------|-----------------|-------------|-----------------------|----------------------|------------------|--------------------------|
|                             | 757-935       | 47.0              | Original | 1.99            | 111.88      | 5.65                  | 86.44                | 3.37             | -7146.98                 |
|                             |               |                   | FFX      | 5.30            | 0.00        | 2.82                  | 87.01                | 1.67             | -7708.58                 |
| PEX6-Hexamer(*used monomer) | 202-979       | 29.0              | Original | 2.50            | 0.85        | 3.87                  | 86.86                | 1.69             | -30409.87                |
|                             |               |                   | FFX      | 2.66            | 0.00        | 2.58                  | 90.98                | 1.34             | -32276.23                |
|                             | 435-930       | 19.0              | Original | 2.49            | 3.48        | 4.05                  | 86.44                | 2.07             | -18814.25                |
|                             |               |                   | FFX      | 1.25            | 0.00        | 2.63                  | 89.68                | 1.13             | -20024.72                |
| PJVK                        | 1-236         | 22.7              | Original | 0.98            | 12.08       | 2.14                  | 89.32                | 2.16             | -9790.25                 |
|                             |               |                   | FFX      | 0.49            | 0.27        | 1.28                  | 94.02                | 1.00             | -10355.57                |
|                             | 27-95         | 30.0              | Original | 6.35            | 61.84       | 1.49                  | 92.54                | 3.34             | -3121.04                 |
|                             |               |                   | FFX      | 3.17            | 0.00        | 1.49                  | 85.07                | 1.54             | -3311.64                 |
| PNPT1                       | 45-754        | 37.0              | Original | 3.80            | 125.40      | 3.39                  | 86.86                | 3.63             | -28238.18                |
|                             |               |                   | FFX      | 3.47            | 0.00        | 2.82                  | 88.98                | 1.49             | -30994.57                |
|                             | 606-752       | 17.9              | Original | 1.57            | 3.44        | 2.07                  | 92.41                | 1.76             | -6502.94                 |
|                             |               |                   | FFX      | 0.79            | 0.00        | 0.69                  | 95.86                | 0.79             | -6744.39                 |
| PNPT1-Heteromer             | 45-749        | 38.2              | Original | 1.91            | 4.05        | 1.43                  | 93.20                | 1.84             | -85144.13                |
|                             |               |                   | FFX      | 1.85            | 0.03        | 0.64                  | 94.28                | 1.10             | -89951.07                |
| PNPT1-Trimer                | 43-744        | 34.3              | Original | 1.51            | 3.49        | 2.52                  | 90.10                | 1.82             | -88386.97                |
|                             |               |                   | FFX      | 1.17            | 0.09        | 1.57                  | 92.29                | 1.07             | -93356.95                |
|                             | 45-593        | 38.7              | Original | 1.36            | 2.27        | 2.74                  | 90.49                | 1.64             | -70064.50                |
|                             |               |                   | FFX      | 1.36            | 0.27        | 0.91                  | 91.41                | 1.21             | -73893.79                |
| POLR1C                      | 40-340        | 47.0              | Original | 1.88            | 84.54       | 0.33                  | 97.32                | 2.73             | -13874.72                |
|                             |               |                   | FFX      | 2.63            | 0.00        | 0.33                  | 95.99                | 1.10             | -14514.71                |
|                             | 51-332        | 34.7              | Original | 0.81            | 8.46        | 2.14                  | 90.71                | 1.99             | -12663.51                |
|                             |               |                   | FFX      | 1.21            | 0.00        | 2.14                  | 92.86                | 1.02             | -13196.05                |
| POLR1D                      | 20-120        | 50.0              | Original | 2.22            | 2.52        | 3.03                  | 90.91                | 1.82             | -4829.22                 |
|                             |               |                   | FFX      | 1.11            | 0.00        | 1.01                  | 90.91                | 1.06             | -5027.74                 |
| POU3F4                      | 187-338       | 63.2              | Original | 2.96            | 0.81        | 0.67                  | 92.67                | 1.57             | -6883.42                 |
|                             |               |                   | FFX      | 0.00            | 0.00        | 0.00                  | 98.00                | 0.50             | -7156.86                 |
|                             | 188-338       | 87.0              | Original | 3.73            | 177.48      | 2.01                  | 94.63                | 3.51             | -6419.51                 |
|                             |               |                   | FFX      | 2.99            | 0.00        | 2.01                  | 94.63                | 1.23             | -7009.59                 |
|                             | 190-331       | 41.9              | Original | 3.20            | 3.49        | 0.71                  | 95.00                | 1.87             | -6367.05                 |
|                             |               |                   | FFX      | 1.60            | 0.00        | 0.00                  | 97.86                | 0.69             | -6623.25                 |
|                             | 194-336       | 62.4              | Original | 5.56            | 4.27        | 2.13                  | 92.91                | 2.23             | -6359.23                 |
|                             |               |                   | FFX      | 0.00            | 0.00        | 0.71                  | 94.33                | 0.89             | -6638.38                 |
| POU4F3                      | 180-333       | 49.0              | Original | 0.00            | 3.58        | 3.29                  | 90.79                | 1.67             | -7176.66                 |

| Gene            | Residue Range | Sequence Identity | Model    | % Poor Rotamers | Clash Score | Ramachandran Outliers | Ramachandran Favored | MolProbity Score | Amoeba Energy (Kcal/Mol) |
|-----------------|---------------|-------------------|----------|-----------------|-------------|-----------------------|----------------------|------------------|--------------------------|
|                 |               |                   | FFX      | 0.76            | 0.00        | 0.66                  | 95.39                | 0.82             | -7467.15                 |
|                 | 183-327       | 38.5              | Original | 3.28            | 2.56        | 2.80                  | 89.51                | 1.99             | -6600.18                 |
|                 |               |                   | FFX      | 1.64            | 0.00        | 0.70                  | 93.71                | 1.08             | -6925.45                 |
|                 | 183-331       | 38.5              | Original | 3.17            | 5.35        | 0.68                  | 94.56                | 2.04             | -6852.23                 |
|                 |               |                   | FFX      | 0.79            | 0.00        | 0.68                  | 96.60                | 0.72             | -7176.18                 |
|                 | 184-333       | 49.7              | Original | 3.15            | 2.85        | 1.35                  | 95.95                | 1.73             | -6889.21                 |
|                 |               |                   | FFX      | 0.79            | 0.00        | 0.00                  | 95.27                | 0.83             | -7128.31                 |
| PRPS1           | 3-318         | 48.0              | Original | 4.48            | 127.69      | 3.50                  | 90.76                | 3.59             | -12861.62                |
|                 |               |                   | FFX      | 4.85            | 0.20        | 2.23                  | 91.72                | 1.60             | -13881.79                |
| PTPRQ           | 2013-2328     | 39.4              | Original | 0.70            | 6.16        | 1.59                  | 92.04                | 1.82             | -13981.36                |
|                 |               |                   | FFX      | 1.41            | 0.00        | 0.64                  | 93.63                | 1.03             | -14648.04                |
|                 | 614-894       | 17.1              | Original | 0.77            | 8.24        | 2.15                  | 87.10                | 2.07             | -11639.20                |
|                 |               |                   | FFX      | 1.15            | 0.00        | 1.43                  | 93.19                | 0.99             | -12400.27                |
|                 | 711-988       | 19.1              | Original | 2.72            | 1.36        | 3.26                  | 89.13                | 1.77             | -11167.89                |
|                 |               |                   | FFX      | 2.33            | 0.00        | 1.81                  | 91.30                | 1.29             | -11814.13                |
|                 | 714-1091      | 18.1              | Original | 0.57            | 8.04        | 3.46                  | 90.43                | 1.98             | -14577.67                |
|                 |               |                   | FFX      | 0.86            | 0.00        | 1.33                  | 91.76                | 1.00             | -15614.36                |
|                 | 797-993       | 13.0              | Original | 3.33            | 107.52      | 3.08                  | 86.67                | 3.52             | -7577.96                 |
|                 |               |                   | FFX      | 3.33            | 0.00        | 1.54                  | 82.05                | 1.60             | -8267.21                 |
|                 | 948-1378      | 18.7              | Original | 2.53            | 11.98       | 2.10                  | 86.71                | 2.53             | -15894.05                |
|                 |               |                   | FFX      | 1.27            | 0.00        | 2.10                  | 90.44                | 1.11             | -17136.20                |
| PTPRQ-Dimer     | 571-898       | 17.3              | Original | 3.62            | 14.17       | 5.06                  | 88.65                | 2.67             | -25571.82                |
|                 |               |                   | FFX      | 2.14            | 0.00        | 1.69                  | 89.57                | 1.31             | -28097.56                |
|                 | 664-992       | 18.3              | Original | 0.99            | 3.19        | 3.98                  | 91.13                | 1.63             | -26754.80                |
|                 |               |                   | FFX      | 1.32            | 0.00        | 1.68                  | 92.66                | 1.05             | -28679.84                |
| RDX             | 3-583         | 59.1              | Original | 0.78            | 3.01        | 1.04                  | 97.75                | 1.15             | -31483.40                |
|                 |               |                   | FFX      | 0.58            | 0.00        | 0.17                  | 97.58                | 0.59             | -32700.66                |
|                 | 337-445       | 16.8              | Original | 0.00            | 1.10        | 3.74                  | 91.59                | 1.32             | -6936.13                 |
|                 |               |                   | FFX      | 0.00            | 0.00        | 0.00                  | 94.39                | 0.88             | -7093.26                 |
|                 | 497-583       | 71.3              | Original | 1.30            | 0.00        | 0.00                  | 100.00               | 0.59             | -4967.98                 |
|                 |               |                   | FFX      | 0.00            | 0.00        | 0.00                  | 100.00               | 0.50             | -5082.64                 |
| RIPOR2 (FAM65B) | 1011-1065     | 19.0              | Original | 4.26            | 113.61      | 1.89                  | 94.34                | 3.38             | -2734.91                 |
|                 |               |                   | FFX      | 4.26            | 0.00        | 0.00                  | 98.11                | 0.98             | -2850.65                 |
|                 | 832-1036      | 13.6              | Original | 1.09            | 7.69        | 2.46                  | 92.61                | 1.91             | -8316.03                 |
|                 |               |                   | FFX      | 1.09            | 0.00        | 0.49                  | 93.10                | 0.97             | -8758.21                 |
|                 | 883-1032      | 14.4              | Original | 0.75            | 8.36        | 2.70                  | 91.22                | 1.97             | -6129.71                 |

| Gene     | Residue Range | Sequence Identity | Model    | % Poor Rotamers | Clash Score | Ramachandran Outliers | Ramachandran Favored | MolProbity Score | Amoeba Energy (Kcal/Mol) |
|----------|---------------|-------------------|----------|-----------------|-------------|-----------------------|----------------------|------------------|--------------------------|
|          |               |                   | FFX      | 1.49            | 0.42        | 0.68                  | 93.92                | 1.19             | -6490.87                 |
| ROR1     | 442-742       | 38.4              | Original | 0.75            | 8.53        | 5.69                  | 86.29                | 2.10             | -12934.43                |
|          |               |                   | FFX      | 1.49            | 0.00        | 1.67                  | 92.31                | 1.11             | -13705.75                |
|          | 464-749       | 70.0              | Original | 0.78            | 52.34       | 0.70                  | 95.42                | 2.51             | -12451.63                |
|          |               |                   | FFX      | 0.39            | 0.00        | 0.00                  | 94.01                | 0.90             | -13090.59                |
|          | 467-749       | 39.2              | Original | 1.19            | 3.75        | 1.42                  | 93.95                | 1.63             | -12334.67                |
|          |               |                   | FFX      | 0.40            | 0.00        | 1.07                  | 96.09                | 0.77             | -12938.67                |
| S1PR2    | 6-301         | 52.0              | Original | 1.97            | 90.68       | 0.68                  | 94.56                | 3.02             | -9461.44                 |
|          |               |                   | FFX      | 2.36            | 0.00        | 1.36                  | 94.22                | 1.17             | -10159.44                |
|          | 7-302         | 51.9              | Original | 1.18            | 4.24        | 0.68                  | 94.90                | 1.61             | -9722.30                 |
|          |               |                   | FFX      | 0.79            | 0.00        | 0.34                  | 97.62                | 0.58             | -10288.58                |
| SERPINB6 | 3-376         | 48.3              | Original | 2.45            | 3.39        | 0.00                  | 98.39                | 1.43             | -16873.97                |
|          |               |                   | FFX      | 0.31            | 0.17        | 0.27                  | 96.77                | 0.77             | -17578.23                |
|          | 347-376       | 55.0              | Original | 0.00            | 37.58       | 3.57                  | 92.86                | 2.51             | -1152.52                 |
|          |               |                   | FFX      | 3.70            | 0.00        | 0.00                  | 96.43                | 1.17             | -1229.01                 |
| SIX5     | 129-259       | 21.2              | Original | 0.93            | 2.28        | 5.43                  | 86.05                | 1.65             | -6175.02                 |
|          |               |                   | FFX      | 0.93            | 0.00        | 1.55                  | 89.15                | 1.07             | -6432.00                 |
|          | 222-255       | 56.0              | Original | 0.00            | 46.71       | 0.00                  | 100.00               | 2.15             | -1675.27                 |
|          |               |                   | FFX      | 0.00            | 0.00        | 0.00                  | 100.00               | 0.50             | -1752.58                 |
|          | 86-257        | 61.6              | Original | 2.14            | 1.06        | 1.18                  | 95.88                | 1.34             | -8061.04                 |
|          |               |                   | FFX      | 1.43            | 0.00        | 1.18                  | 98.24                | 0.62             | -8269.43                 |
| SLC17A8  | 78-520        | 10.0              | Original | 3.59            | 163.18      | 2.27                  | 94.56                | 3.47             | -13946.29                |
|          |               |                   | FFX      | 3.87            | 0.00        | 1.59                  | 90.70                | 1.48             | -15416.53                |
| SLC22A4  | 150-217       | 35.0              | Original | 1.72            | 101.40      | 4.55                  | 89.39                | 3.22             | -2027.87                 |
|          |               |                   | FFX      | 1.72            | 0.00        | 0.00                  | 90.91                | 1.20             | -2174.70                 |
| SLC26A4  | 516-562       | 33.9              | Original | 0.00            | 0.00        | 0.00                  | 95.56                | 0.81             | -1945.74                 |
|          |               |                   | FFX      | 2.38            | 0.00        | 0.00                  | 97.78                | 0.84             | -2021.96                 |
|          | 516-727       | 39.0              | Original | 5.18            | 110.72      | 2.38                  | 90.95                | 3.57             | -8510.95                 |
|          |               |                   | FFX      | 4.15            | 0.00        | 1.43                  | 90.48                | 1.50             | -9491.82                 |
|          | 655-731       | 34.6              | Original | 0.00            | 3.97        | 0.00                  | 97.33                | 1.31             | -3452.13                 |
|          |               |                   | FFX      | 0.00            | 0.00        | 0.00                  | 98.67                | 0.50             | -3562.96                 |
| SLC26A5  | 505-718       | 93.0              | Original | 2.78            | 40.18       | 0.00                  | 97.64                | 2.50             | -9148.25                 |
|          |               |                   | FFX      | 2.22            | 0.00        | 0.00                  | 96.70                | 0.97             | -9774.35                 |
|          | 638-718       | 92.7              | Original | 0.00            | 0.00        | 0.00                  | 100.00               | 0.50             | -3457.98                 |
|          |               |                   | FFX      | 0.00            | 0.00        | 0.00                  | 94.94                | 0.85             | -3571.74                 |
| SLITRK6  | 31-267        | 53.0              | Original | 4.19            | 70.55       | 0.85                  | 92.34                | 3.27             | -9795.96                 |
|          |               |                   | FFX      | 3.72            | 0.00        | 0.43                  | 93.19                | 1.37             | -10395.82                |

| Gene    | Residue Range | Sequence Identity | Model    | % Poor Rotamers | Clash Score | Ramachandran Outliers | Ramachandran Favored | MolProbity Score | Amoeba Energy (Kcal/Mol) |
|---------|---------------|-------------------|----------|-----------------|-------------|-----------------------|----------------------|------------------|--------------------------|
|         | 330-567       | 46.9              | Original | 1.34            | 2.09        | 0.85                  | 91.95                | 1.56             | -10003.81                |
|         |               |                   | FFX      | 2.23            | 0.00        | 2.12                  | 93.22                | 1.20             | -10453.29                |
| SMPX    | 6-75          | 31.0              | Original | 3.45            | 66.48       | 1.47                  | 97.06                | 2.87             | -2975.18                 |
|         |               |                   | FFX      | 3.45            | 0.00        | 0.00                  | 92.65                | 1.37             | -3157.80                 |
|         | 13-42         | 33.3              | Original | 4.35            | 4.42        | 21.43                 | 64.29                | 2.59             | -1232.88                 |
|         |               |                   | FFX      | 0.00            | 0.00        | 3.57                  | 78.57                | 1.25             | -1313.04                 |
| SNAI2   | 124-263       | 36.5              | Original | 3.17            | 1.79        | 0.00                  | 92.75                | 1.78             | -7367.52                 |
|         |               |                   | FFX      | 0.00            | 0.00        | 0.72                  | 91.30                | 1.01             | -7643.96                 |
|         | 125-263       | 29.6              | Original | 4.00            | 3.16        | 2.92                  | 88.32                | 2.16             | -6887.70                 |
|         |               |                   | FFX      | 0.80            | 0.00        | 2.92                  | 92.70                | 0.96             | -7244.36                 |
|         | 126-263       | 34.1              | Original | 7.20            | 4.09        | 6.62                  | 81.62                | 2.56             | -6107.16                 |
|         |               |                   | FFX      | 1.60            | 0.00        | 2.21                  | 92.65                | 1.12             | -6492.47                 |
|         | 129-262       | 42.8              | Original | 0.82            | 4.66        | 2.27                  | 92.42                | 1.71             | -7381.13                 |
|         |               |                   | FFX      | 0.00            | 0.00        | 3.79                  | 88.64                | 1.08             | -7646.15                 |
|         | 158-264       | 87.0              | Original | 8.25            | 47.51       | 0.95                  | 95.24                | 3.18             | -4708.72                 |
|         |               |                   | FFX      | 3.09            | 0.00        | 0.95                  | 93.33                | 1.31             | -5007.63                 |
| SOX10   | 102-173       | 96.0              | Original | 3.12            | 34.04       | 0.00                  | 98.57                | 2.39             | -3771.96                 |
|         |               |                   | FFX      | 3.12            | 0.00        | 0.00                  | 100.00               | 0.88             | -3907.17                 |
| STRC    | 859-1074      | 31.0              | Original | 4.35            | 176.85      | 5.14                  | 82.71                | 3.89             | -7392.04                 |
|         |               |                   | FFX      | 4.35            | 0.30        | 3.74                  | 85.05                | 1.75             | -8165.92                 |
| SYNE4   | 100-201       | 8.0               | Original | 1.28            | 0.62        | 3.00                  | 94.00                | 1.19             | -4392.20                 |
|         |               |                   | FFX      | 1.28            | 0.00        | 1.00                  | 96.00                | 0.86             | -4539.33                 |
|         | 122-249       | 10.4              | Original | 1.00            | 3.57        | 1.59                  | 92.06                | 1.63             | -5385.38                 |
|         |               |                   | FFX      | 1.00            | 0.00        | 2.38                  | 92.86                | 0.95             | -5588.68                 |
|         | 24-202        | 11.4              | Original | 1.44            | 7.08        | 1.13                  | 92.66                | 1.97             | -7712.27                 |
|         |               |                   | FFX      | 0.72            | 0.00        | 0.56                  | 96.05                | 0.77             | -8075.28                 |
|         | 25-195        | 13.7              | Original | 0.76            | 3.54        | 4.14                  | 86.98                | 1.77             | -7379.36                 |
|         |               |                   | FFX      | 1.52            | 0.00        | 1.18                  | 93.49                | 1.06             | -7692.95                 |
|         | 41-253        | 21.0              | Original | 4.76            | 124.45      | 1.42                  | 94.31                | 3.46             | -8804.74                 |
|         |               |                   | FFX      | 4.17            | 0.00        | 0.47                  | 92.89                | 1.42             | -9519.97                 |
| TBC1D24 | 124-292       | 15.0              | Original | 0.68            | 6.24        | 1.80                  | 91.62                | 1.84             | -6910.31                 |
|         |               |                   | FFX      | 2.05            | 0.00        | 0.60                  | 96.41                | 0.98             | -7245.65                 |
|         | 27-310        | 26.9              | Original | 1.22            | 8.77        | 0.35                  | 93.97                | 1.94             | -11757.11                |
|         |               |                   | FFX      | 0.81            | 0.00        | 0.00                  | 95.74                | 0.80             | -12335.34                |
|         | 339-554       | 33.7              | Original | 0.55            | 6.28        | 5.14                  | 84.58                | 2.01             | -8822.86                 |
|         |               |                   | FFX      | 1.09            | 0.00        | 0.00                  | 91.59                | 1.03             | -9293.55                 |
|         | 442-522       | 38.0              | Original | 1.56            | 71.07       | 1.27                  | 94.94                | 2.82             | -3175.68                 |

| Gene            | Residue Range | Sequence Identity | Model    | % Poor Rotamers | Clash Score | Ramachandran Outliers | Ramachandran Favored | MolProbity Score | Amoeba Energy (Kcal/Mol) |
|-----------------|---------------|-------------------|----------|-----------------|-------------|-----------------------|----------------------|------------------|--------------------------|
|                 |               |                   | FFX      | 1.56            | 0.00        | 0.00                  | 93.67                | 1.07             | -3347.27                 |
| TBX1            | 37-79         | 53.0              | Original | 0.00            | 39.86       | 0.00                  | 95.12                | 2.42             | -1393.20                 |
|                 |               |                   | FFX      | 7.14            | 0.00        | 2.44                  | 87.80                | 1.75             | -1457.50                 |
| TCOF1           | 302-465       | 20.0              | Original | 4.59            | 49.77       | 0.00                  | 98.77                | 2.68             | -7143.75                 |
|                 |               |                   | FFX      | 2.75            | 0.00        | 1.23                  | 96.30                | 1.08             | -7581.41                 |
| TECTA           | 1801-2066     | 17.8              | Original | 0.84            | 9.40        | 1.52                  | 96.21                | 1.75             | -11250.03                |
|                 |               |                   | FFX      | 0.42            | 0.00        | 0.38                  | 94.70                | 0.86             | -11843.56                |
|                 | 584-691       | 27.6              | Original | 6.32            | 0.66        | 1.89                  | 91.51                | 1.83             | -4183.96                 |
|                 |               |                   | FFX      | 0.00            | 0.00        | 2.83                  | 95.28                | 0.83             | -4373.30                 |
|                 | 973-1078      | 28.9              | Original | 3.09            | 2.60        | 3.85                  | 87.50                | 2.03             | -4550.77                 |
|                 |               |                   | FFX      | 1.03            | 0.00        | 0.96                  | 93.27                | 0.95             | -4786.39                 |
|                 | 993-1100      | 19.0              | Original | 5.26            | 2.61        | 1.89                  | 94.34                | 1.98             | -4792.71                 |
|                 |               |                   | FFX      | 1.05            | 0.65        | 0.94                  | 95.28                | 1.06             | -4991.64                 |
| TECTA-Heteromer | 1772-2085     | 36.8              | Original | 0.37            | 4.22        | 1.33                  | 94.52                | 1.58             | -26318.22                |
|                 |               |                   | FFX      | 0.55            | 0.00        | 0.17                  | 94.68                | 0.87             | -27657.23                |
| TECTB           | 188-280       | 37.0              | Original | 4.71            | 85.75       | 5.49                  | 87.91                | 3.51             | -3739.66                 |
|                 |               |                   | FFX      | 1.18            | 0.00        | 2.20                  | 84.62                | 1.22             | -4026.46                 |
|                 | 27-286        | 17.5              | Original | 0.86            | 7.05        | 3.10                  | 88.37                | 1.98             | -10322.39                |
|                 |               |                   | FFX      | 3.00            | 0.00        | 0.78                  | 90.70                | 1.39             | -10944.05                |
| TECTB-Dimer     | 27-287        | 22.5              | Original | 0.64            | 6.42        | 1.54                  | 91.12                | 1.87             | -20632.12                |
|                 |               |                   | FFX      | 2.35            | 0.00        | 0.97                  | 92.66                | 1.24             | -22097.80                |
| TIMM8A          | 27-84         | 41.9              | Original | 1.82            | 0.00        | 0.00                  | 94.64                | 1.07             | -2827.67                 |
|                 |               |                   | FFX      | 0.00            | 0.00        | 0.00                  | 100.00               | 0.50             | -2916.38                 |
| TJP2            | 23-132        | 93.0              | Original | 2.20            | 62.02       | 0.93                  | 93.52                | 2.95             | -4665.02                 |
|                 |               |                   | FFX      | 1.10            | 0.00        | 0.93                  | 93.52                | 0.96             | -4961.45                 |
|                 | 24-127        | 97.1              | Original | 2.30            | 1.25        | 3.92                  | 84.31                | 1.79             | -4549.09                 |
|                 |               |                   | FFX      | 0.00            | 0.00        | 0.98                  | 93.14                | 0.94             | -4803.10                 |
|                 | 511-887       | 66.6              | Original | 1.88            | 1.34        | 2.13                  | 93.87                | 1.48             | -17177.87                |
|                 |               |                   | FFX      | 0.62            | 0.00        | 0.53                  | 94.93                | 0.85             | -17936.64                |
| TMC1            | 68-137        | 36.0              | Original | 4.92            | 67.17       | 2.94                  | 94.12                | 3.22             | -4278.30                 |
|                 |               |                   | FFX      | 3.28            | 0.00        | 0.00                  | 92.65                | 1.35             | -4505.95                 |
| TMEM132E        | 337-460       | 17.9              | Original | 1.82            | 3.63        | 3.28                  | 86.07                | 1.99             | -4880.51                 |
|                 |               |                   | FFX      | 0.00            | 0.00        | 1.64                  | 91.80                | 0.99             | -5098.02                 |
|                 | 532-706       | 29.0              | Original | 2.68            | 102.30      | 1.73                  | 93.64                | 3.22             | -6238.41                 |
|                 |               |                   | FFX      | 0.67            | 0.00        | 0.00                  | 93.64                | 0.92             | -6809.73                 |
|                 | 542-675       | 21.4              | Original | 0.87            | 3.97        | 2.27                  | 93.18                | 1.62             | -4704.34                 |

| Gene    | Residue Range | Sequence Identity | Model    | % Poor Rotamers | Clash Score | Ramachandran Outliers | Ramachandran Favored | MolProbity Score | Amoeba Energy (Kcal/Mol) |
|---------|---------------|-------------------|----------|-----------------|-------------|-----------------------|----------------------|------------------|--------------------------|
|         |               |                   | FFX      | 0.00            | 0.00        | 2.27                  | 91.67                | 1.00             | -4920.92                 |
| TMIE    | 1-48          | 48.0              | Original | 0.00            | 34.74       | 0.00                  | 95.65                | 2.33             | -1477.67                 |
|         |               |                   | FFX      | 3.03            | 0.00        | 0.00                  | 97.83                | 0.91             | -1560.68                 |
| TMPRSS3 | 105-451       | 39.9              | Original | 1.03            | 4.58        | 1.16                  | 91.01                | 1.76             | -13588.80                |
|         |               |                   | FFX      | 1.03            | 0.19        | 0.87                  | 93.62                | 1.01             | -14260.37                |
|         | 242-446       | 50.0              | Original | 3.53            | 108.62      | 5.91                  | 85.22                | 3.57             | -7273.74                 |
|         |               |                   | FFX      | 3.53            | 0.00        | 2.96                  | 85.22                | 1.57             | -7949.33                 |
| TNC     | 1043-1340     | 24.5              | Original | 2.44            | 6.18        | 1.35                  | 92.91                | 2.09             | -12396.62                |
|         |               |                   | FFX      | 3.66            | 0.00        | 1.01                  | 94.26                | 1.32             | -12942.89                |
|         | 1132-1420     | 22.9              | Original | 2.10            | 11.72       | 1.74                  | 90.59                | 2.36             | -11402.42                |
|         |               |                   | FFX      | 2.94            | 0.00        | 0.35                  | 91.99                | 1.34             | -12101.86                |
|         | 1223-1511     | 23.4              | Original | 0.81            | 4.55        | 0.70                  | 90.59                | 1.76             | -11786.17                |
|         |               |                   | FFX      | 1.63            | 0.00        | 0.70                  | 89.55                | 1.22             | -12298.44                |
|         | 1254-1603     | 27.1              | Original | 3.02            | 1.50        | 3.45                  | 89.08                | 1.83             | -13972.21                |
|         |               |                   | FFX      | 2.01            | 0.00        | 1.72                  | 92.53                | 1.20             | -14704.18                |
|         | 1545-1885     | 28.8              | Original | 1.03            | 4.97        | 2.06                  | 93.81                | 1.68             | -13941.24                |
|         |               |                   | FFX      | 1.03            | 0.00        | 0.88                  | 93.22                | 0.95             | -14575.78                |
|         | 1580-1878     | 15.5              | Original | 1.18            | 5.23        | 3.03                  | 88.89                | 1.91             | -12200.97                |
|         |               |                   | FFX      | 0.00            | 0.00        | 1.01                  | 92.26                | 0.98             | -12768.28                |
|         | 1585-1886     | 16.7              | Original | 0.78            | 11.04       | 2.33                  | 92.67                | 2.02             | -12162.46                |
|         |               |                   | FFX      | 1.17            | 0.22        | 1.33                  | 93.00                | 1.08             | -12897.68                |
|         | 1620-1968     | 24.6              | Original | 0.66            | 5.63        | 2.02                  | 92.80                | 1.76             | -14168.54                |
|         |               |                   | FFX      | 1.00            | 0.00        | 0.29                  | 93.95                | 0.90             | -14873.07                |
|         | 1620-1975     | 24.2              | Original | 0.98            | 6.99        | 3.67                  | 90.96                | 1.91             | -14342.97                |
|         |               |                   | FFX      | 1.95            | 0.00        | 1.69                  | 92.09                | 1.20             | -15032.24                |
|         | 1625-1797     | 49.0              | Original | 3.33            | 81.93       | 0.58                  | 97.08                | 2.94             | -6989.31                 |
|         |               |                   | FFX      | 2.67            | 0.00        | 0.00                  | 95.91                | 1.11             | -7495.39                 |
|         | 175-374       | 39.2              | Original | 1.20            | 1.48        | 1.01                  | 89.90                | 1.50             | -9304.26                 |
|         |               |                   | FFX      | 0.00            | 0.00        | 0.00                  | 89.90                | 1.05             | -9766.58                 |
|         | 1980-2191     | 39.6              | Original | 0.57            | 5.15        | 0.95                  | 94.29                | 1.66             | -10212.48                |
|         |               |                   | FFX      | 0.57            | 0.00        | 0.00                  | 95.24                | 0.83             | -10599.75                |
|         | 206-425       | 38.1              | Original | 1.10            | 1.68        | 0.92                  | 91.28                | 1.46             | -10407.75                |
|         |               |                   | FFX      | 1.66            | 0.00        | 0.00                  | 91.28                | 1.18             | -10818.11                |
|         | 237-498       | 38.1              | Original | 0.46            | 5.59        | 3.85                  | 86.15                | 1.94             | -12678.03                |
|         |               |                   | FFX      | 0.46            | 0.00        | 0.38                  | 87.31                | 1.11             | -13290.20                |
|         | 297-560       | 33.2              | Original | 0.00            | 3.63        | 2.67                  | 85.11                | 1.81             | -12970.87                |
|         |               |                   | FFX      | 0.45            | 0.00        | 0.38                  | 91.60                | 1.00             | -13576.63                |



| Gene   | Residue Range | Sequence Identity | Model    | % Poor Rotamers | Clash Score | Ramachandran Outliers | Ramachandran Favored | MolProbity Score | Amoeba Energy (Kcal/Mol) |
|--------|---------------|-------------------|----------|-----------------|-------------|-----------------------|----------------------|------------------|--------------------------|
|        | 300-529       | 40.3              | Original | 1.05            | 7.35        | 0.44                  | 90.79                | 1.95             | -11412.66                |
|        |               |                   | FFX      | 0.00            | 0.00        | 0.88                  | 92.11                | 0.98             | -11821.36                |
|        | 623-974       | 29.3              | Original | 0.32            | 7.06        | 1.14                  | 92.00                | 1.88             | -16127.06                |
|        |               |                   | FFX      | 0.32            | 0.00        | 0.29                  | 94.29                | 0.89             | -16856.75                |
|        | 623-983       | 29.5              | Original | 0.63            | 22.15       | 0.84                  | 92.20                | 2.32             | -16255.07                |
|        |               |                   | FFX      | 1.58            | 0.00        | 0.56                  | 94.43                | 1.03             | -17087.80                |
|        | 625-893       | 13.6              | Original | 0.41            | 19.47       | 3.37                  | 86.52                | 2.42             | -11983.81                |
|        |               |                   | FFX      | 1.65            | 0.00        | 1.87                  | 91.76                | 1.16             | -12615.37                |
|        | 712-1063      | 25.7              | Original | 0.65            | 7.42        | 1.43                  | 92.29                | 1.88             | -16105.37                |
|        |               |                   | FFX      | 1.95            | 0.00        | 0.86                  | 93.43                | 1.15             | -16762.76                |
|        | 712-1071      | 23.5              | Original | 1.27            | 10.27       | 1.12                  | 91.62                | 2.11             | -16260.65                |
|        |               |                   | FFX      | 0.96            | 0.00        | 0.84                  | 93.30                | 0.94             | -17086.75                |
|        | 766-984       | 28.5              | Original | 3.21            | 11.92       | 4.15                  | 85.71                | 2.62             | -9507.50                 |
|        |               |                   | FFX      | 2.14            | 0.00        | 4.15                  | 90.78                | 1.28             | -10175.25                |
|        | 854-1147      | 29.3              | Original | 1.21            | 4.40        | 2.05                  | 93.15                | 1.72             | -12802.49                |
|        |               |                   | FFX      | 1.21            | 0.00        | 1.03                  | 95.89                | 0.85             | -13386.34                |
|        | 854-1162      | 25.3              | Original | 0.77            | 5.87        | 2.28                  | 90.55                | 1.85             | -13259.80                |
|        |               |                   | FFX      | 1.54            | 0.00        | 0.98                  | 92.83                | 1.10             | -13919.22                |
|        | 893-1235      | 26.5              | Original | 0.00            | 1.52        | 0.88                  | 91.50                | 1.40             | -14380.96                |
|        |               |                   | FFX      | 1.42            | 0.00        | 0.88                  | 92.38                | 1.09             | -15036.88                |
| TPRN   | 159-189       | 68.0              | Original | 0.00            | 35.26       | 0.00                  | 96.55                | 2.25             | -873.77                  |
|        |               |                   | FFX      | 9.52            | 0.00        | 0.00                  | 93.10                | 1.69             | -913.37                  |
| TRIOBP | 1807-1887     | 42.0              | Original | 1.39            | 83.96       | 1.27                  | 89.87                | 3.05             | -3867.36                 |
|        |               |                   | FFX      | 2.78            | 0.00        | 1.27                  | 93.67                | 1.26             | -4083.53                 |
|        | 2065-2251     | 17.0              | Original | 0.00            | 2.99        | 1.62                  | 94.05                | 1.49             | -9877.05                 |
|        |               |                   | FFX      | 0.62            | 0.00        | 1.08                  | 96.76                | 0.70             | -10281.07                |
|        | 2072-2355     | 13.1              | Original | 0.00            | 4.13        | 1.42                  | 91.84                | 1.69             | -14628.96                |
|        |               |                   | FFX      | 1.20            | 0.00        | 1.42                  | 91.84                | 1.05             | -15173.87                |
|        | 2113-2332     | 12.1              | Original | 2.03            | 0.56        | 1.83                  | 93.12                | 1.37             | -11556.28                |
|        |               |                   | FFX      | 1.02            | 0.00        | 0.00                  | 93.58                | 0.93             | -12051.77                |
|        | 2115-2255     | 13.6              | Original | 0.80            | 2.17        | 0.00                  | 97.12                | 1.15             | -7853.07                 |
|        |               |                   | FFX      | 0.00            | 0.00        | 0.72                  | 97.84                | 0.54             | -8058.03                 |
|        | 2115-2262     | 15.0              | Original | 0.00            | 4.96        | 0.68                  | 95.21                | 1.59             | -8036.34                 |
|        |               |                   | FFX      | 0.00            | 0.00        | 0.00                  | 98.63                | 0.50             | -8299.32                 |
|        | 2115-2263     | 18.5              | Original | 0.76            | 1.23        | 0.68                  | 95.24                | 1.17             | -8075.60                 |
|        |               |                   | FFX      | 0.76            | 0.00        | 0.00                  | 97.28                | 0.64             | -8356.36                 |
|        | 2115-2321     | 13.4              | Original | 0.00            | 3.86        | 0.49                  | 96.59                | 1.39             | -10939.76                |

| Gene   | Residue Range | Sequence Identity | Model    | % Poor Rotamers | Clash Score | Ramachandran Outliers | Ramachandran Favored | MolProbity Score | Amoeba Energy (Kcal/Mol) |
|--------|---------------|-------------------|----------|-----------------|-------------|-----------------------|----------------------|------------------|--------------------------|
|        |               |                   | FFX      | 0.00            | 0.00        | 0.00                  | 96.59                | 0.72             | -11368.16                |
|        | 2117-2335     | 22.6              | Original | 0.00            | 3.36        | 2.76                  | 91.24                | 1.64             | -11507.78                |
|        |               |                   | FFX      | 0.00            | 0.00        | 0.92                  | 91.71                | 1.00             | -11940.14                |
|        | 2127-2345     | 12.1              | Original | 2.54            | 6.11        | 2.30                  | 92.17                | 2.12             | -11779.01                |
|        |               |                   | FFX      | 0.00            | 0.00        | 0.46                  | 95.85                | 0.79             | -12283.39                |
|        | 2129-2349     | 16.1              | Original | 1.01            | 1.37        | 3.20                  | 87.21                | 1.49             | -11590.46                |
|        |               |                   | FFX      | 0.51            | 0.00        | 1.37                  | 92.69                | 0.96             | -12131.63                |
|        | 2130-2287     | 8.2               | Original | 0.00            | 7.07        | 1.28                  | 94.23                | 1.78             | -8328.24                 |
|        |               |                   | FFX      | 0.00            | 0.00        | 0.00                  | 96.79                | 0.70             | -8722.64                 |
|        | 2130-2324     | 18.9              | Original | 0.00            | 1.57        | 2.59                  | 92.75                | 1.36             | -10347.82                |
|        |               |                   | FFX      | 0.58            | 0.00        | 0.00                  | 93.78                | 0.91             | -10727.58                |
|        | 2137-2335     | 11.1              | Original | 2.26            | 4.32        | 3.55                  | 90.36                | 2.02             | -10214.41                |
|        |               |                   | FFX      | 1.13            | 0.00        | 1.52                  | 93.91                | 0.95             | -10701.98                |
|        | 2154-2317     | 11.9              | Original | 0.00            | 7.53        | 1.85                  | 93.83                | 1.82             | -8474.53                 |
|        |               |                   | FFX      | 0.69            | 0.00        | 0.62                  | 96.91                | 0.68             | -8854.40                 |
|        | 2166-2311     | 17.3              | Original | 0.00            | 0.84        | 0.00                  | 94.44                | 1.14             | -7682.42                 |
|        |               |                   | FFX      | 0.00            | 0.00        | 0.69                  | 97.22                | 0.64             | -7998.45                 |
|        | 2188-2350     | 13.6              | Original | 2.01            | 11.86       | 3.73                  | 90.06                | 2.37             | -8608.91                 |
|        |               |                   | FFX      | 0.67            | 0.00        | 0.62                  | 94.41                | 0.88             | -9076.94                 |
|        | 2190-2360     | 18.2              | Original | 0.65            | 7.47        | 1.78                  | 89.94                | 1.96             | -8924.89                 |
|        |               |                   | FFX      | 1.29            | 0.00        | 0.59                  | 95.27                | 0.91             | -9368.68                 |
|        | 2200-2355     | 10.0              | Original | 0.71            | 4.28        | 2.60                  | 92.21                | 1.69             | -8213.13                 |
|        |               |                   | FFX      | 0.00            | 0.00        | 0.00                  | 94.16                | 0.89             | -8548.80                 |
| TSPEAR | 106-160       | 42.0              | Original | 4.26            | 92.45       | 1.89                  | 92.45                | 3.38             | -2148.61                 |
|        |               |                   | FFX      | 2.13            | 0.00        | 0.00                  | 90.57                | 1.28             | -2283.72                 |
| TWINK  | 174-631       | 19.0              | Original | 0.50            | 14.05       | 2.85                  | 88.60                | 2.24             | -19079.66                |
|        |               |                   | FFX      | 1.00            | 0.00        | 0.44                  | 90.57                | 1.03             | -20395.36                |
|        | 404-453       | 36.0              | Original | 0.00            | 31.83       | 0.00                  | 97.92                | 2.01             | -2036.69                 |
|        |               |                   | FFX      | 0.00            | 0.00        | 0.00                  | 97.92                | 0.52             | -2141.70                 |
|        | 57-359        | 17.9              | Original | 2.33            | 15.47       | 3.32                  | 89.04                | 2.55             | -12491.61                |
|        |               |                   | FFX      | 2.71            | 0.00        | 0.00                  | 93.36                | 1.26             | -13352.53                |
| USH1C  | 108-301       | 22.1              | Original | 2.42            | 9.86        | 3.12                  | 90.10                | 2.35             | -7836.33                 |
|        |               |                   | FFX      | 0.61            | 0.00        | 1.04                  | 92.71                | 0.96             | -8230.81                 |
|        | 300-383       | 18.0              | Original | 1.30            | 32.06       | 0.00                  | 100.00               | 2.08             | -5397.15                 |
|        |               |                   | FFX      | 2.60            | 0.00        | 0.00                  | 100.00               | 0.81             | -5648.61                 |
|        | 82-291        | 35.3              | Original | 1.68            | 11.24       | 6.25                  | 85.58                | 2.39             | -8556.78                 |
|        |               |                   | FFX      | 1.12            | 0.00        | 1.92                  | 90.87                | 1.06             | -8985.90                 |

| Gene    | Residue Range | Sequence Identity | Model    | % Poor Rotamers | Clash Score | Ramachandran Outliers | Ramachandran Favored | MolProbity Score | Amoeba Energy (Kcal/Mol) |
|---------|---------------|-------------------|----------|-----------------|-------------|-----------------------|----------------------|------------------|--------------------------|
|         | 83-281        | 33.3              | Original | 0.59            | 8.88        | 3.55                  | 85.79                | 2.12             | -8280.33                 |
|         |               |                   | FFX      | 1.18            | 0.00        | 3.05                  | 90.86                | 1.08             | -8686.03                 |
|         | 86-281        | 34.0              | Original | 6.59            | 7.06        | 4.64                  | 80.41                | 2.74             | -7865.19                 |
|         |               |                   | FFX      | 1.80            | 0.00        | 2.06                  | 90.21                | 1.24             | -8398.80                 |
| USH1G   | 1-157         | 31.4              | Original | 0.00            | 9.29        | 1.94                  | 94.19                | 1.89             | -7572.73                 |
|         |               |                   | FFX      | 0.76            | 0.00        | 0.00                  | 96.13                | 0.76             | -7813.57                 |
|         | 1-166         | 24.2              | Original | 2.14            | 2.63        | 0.61                  | 95.12                | 1.64             | -8160.69                 |
|         |               |                   | FFX      | 0.71            | 0.00        | 0.00                  | 96.95                | 0.68             | -8479.82                 |
|         | 2-161         | 36.5              | Original | 0.00            | 3.95        | 2.53                  | 93.04                | 1.63             | -7839.43                 |
|         |               |                   | FFX      | 0.00            | 0.00        | 0.63                  | 96.20                | 0.76             | -8128.72                 |
| 388-461 | 99.0          | Original          | 0.00     | 31.75           | 0.00        | 95.83                 | 2.27                 | -3532.39         |                          |
|         |               | FFX               | 1.54     | 0.00            | 0.00        | 98.61                 | 0.64                 | -3630.99         |                          |
| USH2A   | 1509-1893     | 24.9              | Original | 1.85            | 13.01       | 3.13                  | 89.03                | 2.40             | -15049.74                |
|         |               |                   | FFX      | 1.85            | 0.00        | 1.04                  | 90.60                | 1.24             | -16074.76                |
|         | 2325-2921     | 17.1              | Original | 3.35            | 9.92        | 4.71                  | 86.89                | 2.54             | -20997.61                |
|         |               |                   | FFX      | 3.35            | 0.22        | 3.36                  | 88.24                | 1.58             | -22643.89                |
|         | 2326-2921     | 19.1              | Original | 2.24            | 6.81        | 3.87                  | 87.21                | 2.26             | -20939.33                |
|         |               |                   | FFX      | 3.36            | 0.00        | 3.03                  | 88.72                | 1.48             | -22746.31                |
|         | 2327-2816     | 16.7              | Original | 2.06            | 10.47       | 5.33                  | 86.48                | 2.41             | -16756.46                |
|         |               |                   | FFX      | 1.38            | 0.13        | 2.66                  | 88.11                | 1.26             | -18417.38                |
|         | 2409-2823     | 16.9              | Original | 2.16            | 9.44        | 4.36                  | 88.86                | 2.33             | -14460.91                |
|         |               |                   | FFX      | 1.35            | 0.16        | 1.94                  | 90.07                | 1.21             | -15647.65                |
|         | 287-715       | 31.7              | Original | 2.36            | 8.65        | 2.58                  | 89.23                | 2.32             | -18464.57                |
|         |               |                   | FFX      | 2.36            | 0.00        | 1.87                  | 91.80                | 1.28             | -19742.57                |
|         | 287-728       | 35.0              | Original | 0.76            | 6.29        | 1.36                  | 87.27                | 1.96             | -19133.75                |
|         |               |                   | FFX      | 1.02            | 0.00        | 0.23                  | 91.59                | 1.01             | -20375.77                |
|         | 326-728       | 38.5              | Original | 1.39            | 9.38        | 2.74                  | 86.28                | 2.24             | -17655.70                |
|         |               |                   | FFX      | 1.39            | 0.16        | 1.50                  | 92.77                | 1.13             | -18658.26                |
| 950-991 | 43.0          | Original          | 8.57     | 108.62          | 2.50        | 87.50                 | 3.82                 | -1696.90         |                          |
|         |               | FFX               | 0.00     | 0.00            | 0.00        | 87.50                 | 1.11                 | -1814.62         |                          |
| WFS1    | 759-835       | 43.0              | Original | 0.00            | 36.10       | 1.33                  | 94.67                | 2.41             | -3422.21                 |
|         |               |                   | FFX      | 0.00            | 0.00        | 1.33                  | 89.33                | 1.07             | -3610.99                 |
|         | 82-188        | 14.7              | Original | 0.00            | 5.27        | 1.90                  | 91.43                | 1.79             | -5440.82                 |
|         |               |                   | FFX      | 2.25            | 0.00        | 0.95                  | 93.33                | 1.20             | -5633.96                 |
|         | 83-186        | 17.2              | Original | 1.15            | 1.80        | 2.94                  | 88.24                | 1.58             | -5226.81                 |
|         |               |                   | FFX      | 1.15            | 0.00        | 0.98                  | 95.10                | 0.89             | -5479.67                 |
| 86-188  | 15.6          | Original          | 1.16     | 3.62            | 0.00        | 87.13                 | 1.82                 | -5160.64         |                          |

| Gene     | Residue Range | Sequence Identity | Model    | % Poor Rotamers | Clash Score | Ramachandran Outliers | Ramachandran Favored | MolProbity Score | Amoeba Energy (Kcal/Mol) |
|----------|---------------|-------------------|----------|-----------------|-------------|-----------------------|----------------------|------------------|--------------------------|
|          |               |                   | FFX      | 1.16            | 0.00        | 0.99                  | 95.05                | 0.89             | -5340.43                 |
| WHRN     | 260-378       | 97.0              | Original | 2.06            | 55.43       | 2.56                  | 92.31                | 2.93             | -5267.44                 |
|          |               |                   | FFX      | 1.03            | 0.00        | 0.85                  | 94.02                | 0.91             | -5615.43                 |
| Averages |               | 41.74             | Original | 2.33            | 25.00       | 2.03                  | 91.94                | 2.16             | -15342.08                |
|          |               |                   | FFX      | 1.60            | 0.03        | 0.93                  | 93.48                | 1.04             | -16287.37                |
